# Supplementary material for: Molecular Traits and Functional Analysis of the CLAVATA3/Endosperm Surrounding Region-Related Small Signaling Peptides in Three Species of Gossypium Genus
Source: Frontiers journal article supplement (doi:10.3389/fpls.2021.671626), 2021-06-04
Supplement: Data_Sheet_1.PDF [file Data_Sheet_1.PDF]

# Supplementary Material

## Supplementary Figures

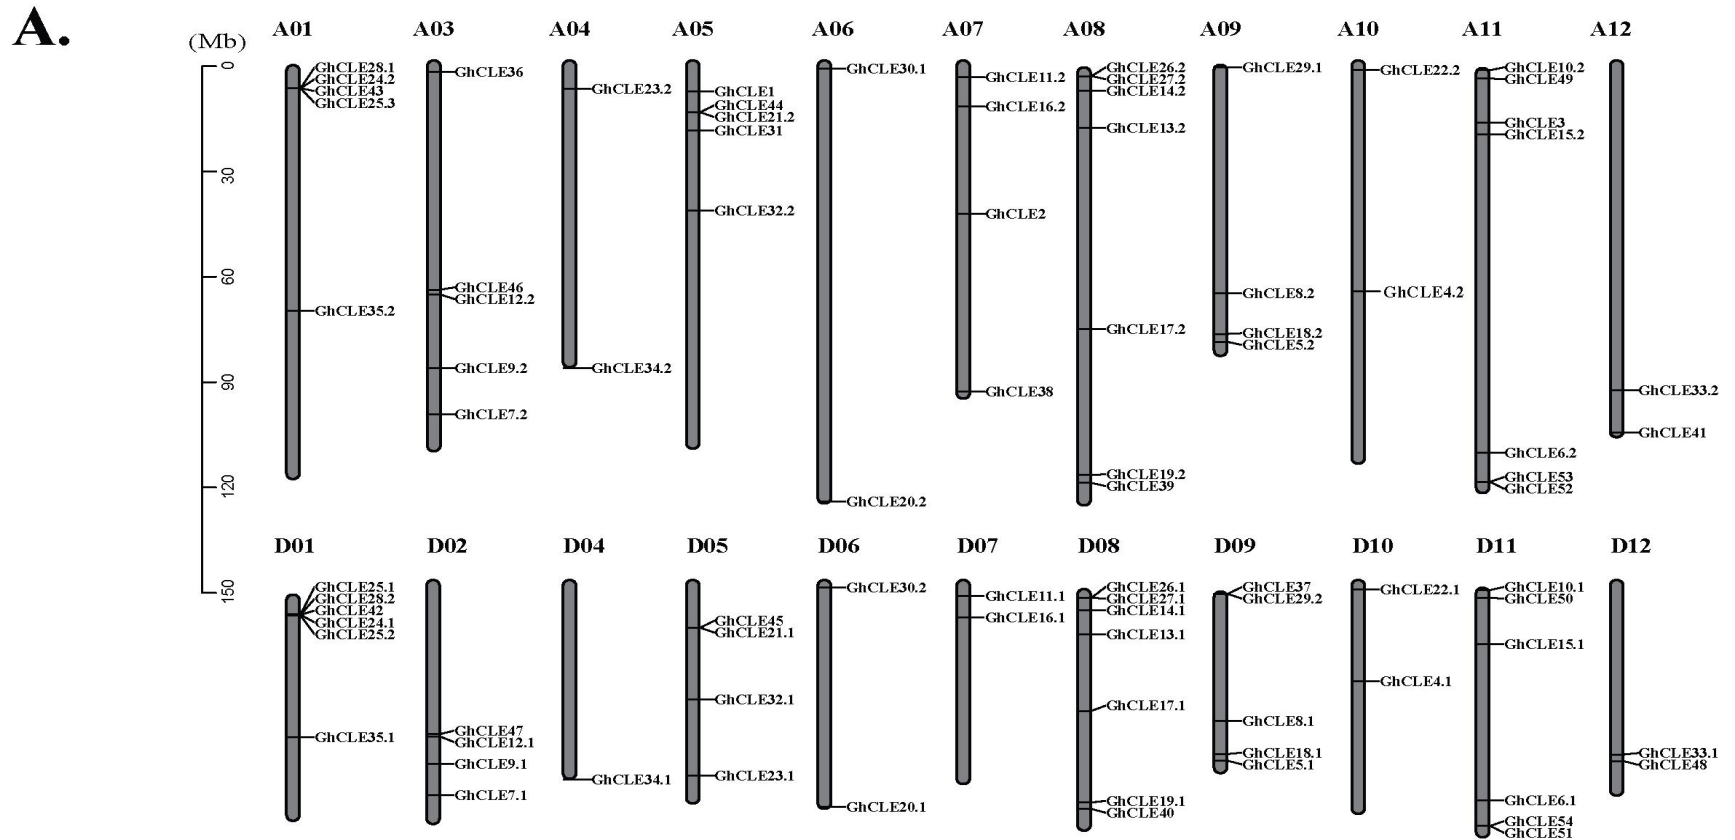

**B.**

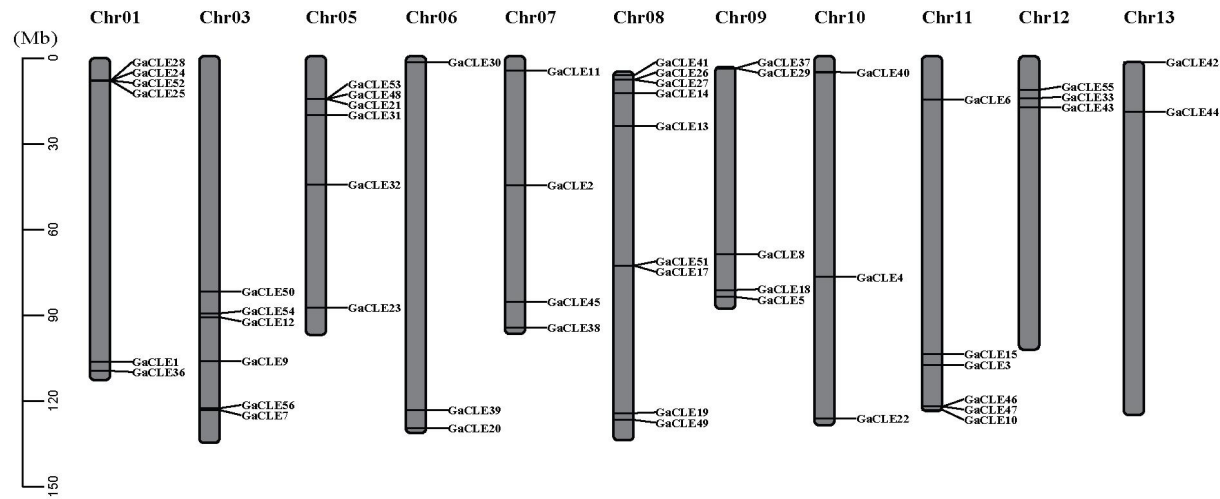

**C.**

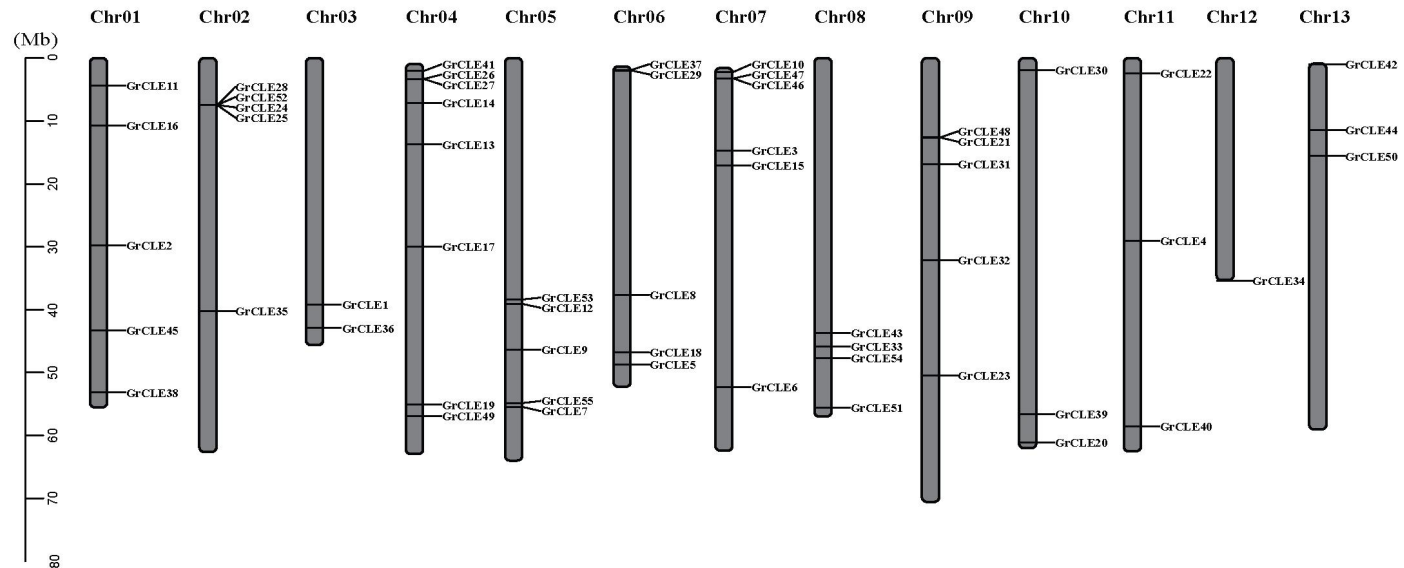

**Supplementary Figure 1.** A, B and C represent the chromosomal location of CLE gene on the chromosomes of *G. hirsutum*, *G. arboreum*, and *G. raimondii*, respectively. Above each gray bar are the names of chromosomes. The black line indicates the location of the corresponding gene. The vertical scale on the left indicates the size of the chromosome, and the scale represents the Mega Base (MB). The gene names correspond to Table 1-3.

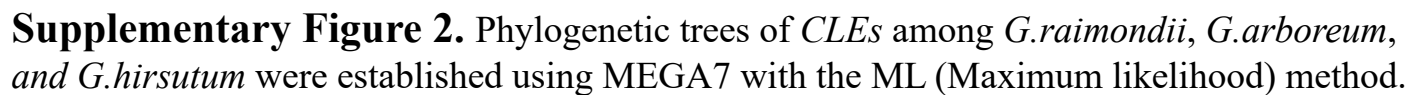

**Supplementary Figure 2.** Phylogenetic trees of *CLEs* among *G.raimondii*, *G.arboreum*, and *G.hirsutum* were established using MEGA7 with the ML (Maximum likelihood) method.



# VII

|                      | signal peptide |   |   |   |   |    |   |   |   |   |    |   |   |   |   | CLE motif |   |   |   |   |    |   |   |   |   |    |   |   |   |   |    |   |   |   |   |    |   |   |   |   |   |   |   |   |   |   |   |   |   |   |   |   |   |   |   |   |   |   |   |   |   |   |   |   |   |   |   |   |   |   |   |   |   |   |   |   |   |   |   |   |   |   |   |   |   |   |   |   |
|----------------------|----------------|---|---|---|---|----|---|---|---|---|----|---|---|---|---|-----------|---|---|---|---|----|---|---|---|---|----|---|---|---|---|----|---|---|---|---|----|---|---|---|---|---|---|---|---|---|---|---|---|---|---|---|---|---|---|---|---|---|---|---|---|---|---|---|---|---|---|---|---|---|---|---|---|---|---|---|---|---|---|---|---|---|---|---|---|---|---|---|---|
|                      | 10             |   |   |   |   | 20 |   |   |   |   | 30 |   |   |   |   | 40        |   |   |   |   | 50 |   |   |   |   | 60 |   |   |   |   | 70 |   |   |   |   | 80 |   |   |   |   |   |   |   |   |   |   |   |   |   |   |   |   |   |   |   |   |   |   |   |   |   |   |   |   |   |   |   |   |   |   |   |   |   |   |   |   |   |   |   |   |   |   |   |   |   |   |   |   |
| GhCLE24.2            | M              | A | S | F | K | V  | L | F | Y | L | S  | L | Q | V | L | F         | L | V | S | S | C  | G | T | R | L | F  | G | T | D | Q | L  | A | L | A | V | A  | G | K | Q | H | S | K | A | N | I | I | E | A | K | R | P | L | I | E | E | G | R | E | A | I | K | A | S | I | Q | R | N | G | G | I | P | F | E | S | K | R | L | S | P | G | G | P | D | P | H | H | H | K |
| GaCLE24              | M              | A | S | F | K | V  | L | F | Y | L | S  | L | Q | V | L | F         | L | V | S | S | C  | G | T | R | L | F  | G | T | D | Q | L  | A | L | A | V | A  | G | K | Q | H | S | K | A | N | I | I | E | A | K | R | P | L | I | E | E | G | R | E | A | I | K | A | S | I | Q | R | N | G | G | I | P | F | E | S | K | R | L | S | P | G | G | P | D | P | H | H | H | K |
| MASFKLVLFYLSLQVLFVLS | S              | G | A | R | L | F  | G | T | D | Q | L  | A | L | A | V | A         | G | K | Q | H | S  | K | A | T | I | I  | E | A | N | R | P  | L | I | E | E | G  | R | E | A | I | K | A | S | I | Q | R | N | G | G | I | P | F | E | S | K | R | L | S | P | G | G | P | D | P | H | H | H | K |   |   |   |   |   |   |   |   |   |   |   |   |   |   |   |   |   |   |   |   |
| GrCLE52              | M              | A | S | F | K | V  | L | F | Y | L | S  | L | Q | V | L | F         | L | V | S | S | S  | G | A | R | L | F  | G | T | D | Q | L  | A | L | A | V | A  | G | K | Q | H | S | K | A | T | I | I | E | A | N | R | P | L | I | E | E | G | R | E | A | I | K | A | S | I | Q | R | N | G | G | I | P | F | E | S | K | R | L | S | P | G | G | P | D | P | H | H | H | K |
| GhCLE24.1            | M              | A | S | F | K | V  | L | F | Y | L | S  | L | Q | V | L | F         | L | V | S | S | S  | G | T | R | L | F  | G | T | D | Q | L  | A | L | A | V | A  | G | K | Q | H | S | K | A | T | I | I | E | A | K | R | P | L | I | E | E | G | R | E | A | I | K | A | S | I | Q | R | N | G | G | I | P | F | E | S | K | R | L | S | P | G | G | P | D | P | H | H | H | K |
| GrCLE24              | M              | A | S | F | K | V  | L | F | Y | L | S  | L | Q | V | L | F         | L | V | S | S | S  | G | T | R | L | F  | G | T | D | Q | L  | A | L | A | V | A  | G | K | Q | H | S | K | A | T | I | I | E | A | N | R | P | L | I | E | E | G | R | E | A | I | K | A | S | I | Q | R | N | G | G | I | P | F | E | S | K | R | L | S | P | G | G | P | D | P | H | H | H | K |
| GhCLE43              | M              | A | S | F | K | V  | L | F | Y | L | S  | L | Q | V | L | F         | L | V | S | S | S  | G | T | R | L | F  | G | T | D | Q | L  | A | L | A | V | A  | G | K | Q | H | S | K | A | T | I | I | E | A | K | R | P | L | I | E | E | G | R | E | A | I | K | A | S | I | Q | R | N | A | G | I | P | F | E | S | K | R | L | S | P | G | G | P | D | P | H | H | H | K |
| GaCLE52              | M              | A | S | F | K | V  | L | F | Y | L | S  | L | Q | V | L | F         | L | V | S | S | S  | G | T | R | L | F  | G | T | D | Q | L  | A | L | A | V | A  | G | K | Q | H | S | K | A | T | I | I | E | A | K | R | P | L | I | E | E | G | R | E | A | I | K | A | S | I | Q | R | N | A | G | I | P | F | E | S | K | R | L | S | P | G | G | P | D | P | H | H | H | K |
| GhCLE25.3            | M              | A | S | F | K | V  | L | F | C | L | S  | L | H | V | L | F         | L | V | S | S | S  | G | T | R | L | F  | G | I | D | Q | L  | A | L | A | V | A  | D | K | Q | H | P | E | A | A | I | I | E | S | K | R | A | L | I | E | E | G | R | E | A | I | K | A | S | I | E | R | N | G | G | I | P | Y | E | T | K | R | R | S | P | G | G | P | D | P | H | H | H | - |
| GaCLE25              | M              | A | S | F | K | V  | L | F | C | L | S  | L | H | V | L | F         | L | V | S | S | S  | G | T | R | L | F  | G | I | D | Q | L  | A | L | A | V | A  | D | K | Q | H | P | E | A | A | I | I | E | S | K | R | A | L | I | E | E | G | R | E | A | I | K | A | S | I | E | R | N | G | G | I | P | Y | E | T | K | R | R | S | P | G | G | P | D | P | H | H | H | - |
| GhCLE25.1            | M              | A | S | F | K | V  | L | F | C | L | S  | L | H | V | L | F         | L | V | S | S | S  | G | T | R | L | F  | G | I | D | Q | L  | A | L | A | V | A  | D | K | Q | H | P | E | A | A | I | I | E | S | K | R | A | L | I | E | E | G | R | E | A | I | K | A | S | I | E | R | N | G | G | I | P | Y | E | T | K | R | R | S | P | G | G | P | D | P | H | H | H | - |
| GrCLE25              | M              | A | S | F | K | V  | L | F | C | L | S  | L | H | V | L | F         | L | V | S | S | S  | G | T | R | L | F  | G | I | D | Q | L  | A | L | A | V | A  | D | K | Q | H | P | E | A | A | I | I | E | S | K | R | A | L | I | E | E | G | R | E | A | I | K | A | S | I | E | R | N | G | G | I | P | Y | E | T | K | R | R | S | P | G | G | P | D | P | H | H | H | - |
| GhCLE25.2            | M              | A | S | F | K | V  | L | F | C | L | S  | L | H | V | L | F         | L | V | S | S | S  | G | T | R | L | F  | G | I | D | Q | L  | A | L | A | V | A  | D | K | Q | H | P | E | A | A | I | I | E | S | K | R | A | L | I | E | E | G | R | E | A | I | K | A | S | I | E | R | N | G | G | I | P | Y | E | T | K | R | R | S | P | G | G | P | D | P | H | H | H | - |
| GhCLE23.2            | A              | T | T | F | K | L  | F | F | T | L | C  | L | P | A | F | F         | L | I | P | S | S  | G | T | R | L | F  | Q | L | S | L | A  | V | A | G | A | N  | - | G | A | E | S | E | Q | F | Q | S | N | S | K | H | T | M | K | E | A | R | E | A | I | K | A | S | I | E | R | N | A | G | N | P | L | E | S | K | R | L | S | P | G | G | P | D | P | H | H | H | - |   |
| GaCLE23              | A              | T | T | F | K | L  | F | F | T | L | C  | L | P | A | F | F         | L | I | P | S | T  | G | T | R | L | F  | Q | L | S | L | A  | V | A | G | A | N  | - | G | A | E | S | E | Q | F | Q | S | N | S | K | H | T | M | K | E | A | R | E | A | I | K | A | S | I | E | R | N | A | G | N | P | L | E | S | K | R | L | S | P | G | G | P | D | P | H | H | H | - |   |
| GhCLE23.1            | M              | A | T | F | K | L  | F | F | T | L | C  | L | H | A | F | F         | L | I | P | S | S  | G | I | R | L | F  | Q | L | S | L | A  | V | R | G | N | E  | G | A | E | S | E | Q | F | R | S | N | S | R | H | T | M | K | E | A | R | E | A | I | K | A | S | I | E | R | N | A | G | N | P | L | E | S | K | R | L | S | P | G | G | P | D | P | H | H | H | - |   |   |
| GrCLE23              | M              | A | T | F | K | L  | F | F | T | L | C  | L | H | A | F | F         | L | I | P | S | S  | G | I | R | L | F  | Q | L | S | L | A  | V | R | N | E | G  | A | E | S | E | Q | F | R | S | N | S | K | H | T | M | K | E | A | R | E | A | I | K | A | S | I | E | R | N | A | G | N | P | L | E | S | K | R | L | S | P | G | G | P | D | P | H | H | H | - |   |   |   |
| GhCLE26.2            | M              | A | T | F | N | V  | S | F | I | L | S  | L | Y | A | L | L         | I | S | S | S | A  | S | R | L | P | V  | D | K | Q | E | V  | S | E | T | - | N  | G | K | S | E | I | F | G | G | T | N | K | R | A | L | I | E | E | G | R | E | A | I | Q | A | S | L | K | R | N | A | G | N | P | L | E | S | K | R | R | S | P | G | G | P | D | P | H | H | H | - |   |   |
| GaCLE26              | M              | A | T | F | N | V  | S | F | I | L | S  | L | Y | A | L | L         | I | S | S | S | A  | S | R | L | P | V  | D | K | Q | E | V  | S | E | T | - | N  | G | K | S | E | I | F | G | G | T | N | K | R | A | L | I | E | E | G | R | E | A | I | Q | A | S | L | K | R | N | A | G | N | P | L | E | S | K | R | R | S | P | G | G | P | D | P | H | H | H | - |   |   |
| GhCLE26.1            | M              | A | T | F | N | V  | S | F | I | L | S  | L | Y | A | L | L         | I | S | S | A | T  | R | L | P | V | D  | K | Q | E | V | S  | E | T | - | N | G  | K | S | E | I | F | G | G | T | N | K | R | A | L | I | E | E | G | R | E | A | I | Q | A | S | L | K | R | N | A | G | N | P | L | E | S | K | R | R | S | P | G | G | P | D | P | H | H | H | - |   |   |   |
| GrCLE26              | M              | A | T | F | N | V  | S | F | I | L | S  | L | Y | A | L | L         | I | S | S | A | T  | R | L | P | V | D  | K | Q | E | V | S  | E | T | - | N | G  | K | S | E | I | F | G | G | T | N | K | C | A | L | I | E | E | G | R | K | A | I | Q | A | S | L | K | R | N | A | G | N | P | L | E | S | K | R | R | S | P | G | G | P | D | P | H | H | H | - |   |   |   |
| GhCLE27.2            | M              | A | T | F | N | L  | F | F | I | L | S  | L | Y | A | L | L         | V | S | C | S | A  | T | R | L | P | V  | E | K | Q | V | R  | E | T | - | N | G  | S | E | Q | Y | G | S | T | I | K | R | A | L | I | E | E | G | R | E | A | I | K | A | S | L | K | R | N | A | G | N | P | L | E | S | K | R | Q | S | P | G | G | P | D | P | H | H | H | - |   |   |   |   |
| GaCLE27              | M              | A | T | F | N | L  | F | F | I | L | S  | L | Y | A | L | L         | V | S | C | S | A  | T | R | L | P | V  | E | K | Q | V | R  | E | T | - | N | G  | S | E | Q | Y | G | S | T | I | K | R | A | L | I | E | E | G | R | E | A | I | K | A | S | L | K | R | N | A | G | N | P | L | E | S | K | R | Q | S | P | G | G | P | D | P | H | H | H | - |   |   |   |   |
| GhCLE27.1            | M              | A | T | F | N | L  | F | F | I | L | S  | L | Y | A | L | L         | V | S | C | S | A  | T | R | L | P | V  | E | K | Q | V | R  | E | T | - | N | G  | S | E | Q | Y | G | S | T | I | K | R | A | L | I | E | E | G | R | E | A | I | K | A | S | L | K | R | N | A | G | N | P | L | E | S | K | R | R | S | P | G | G | P | D | P | H | H | H | - |   |   |   |   |
| GrCLE27              | M              | A | T | F | N | F  | F | I | L | S |    |   |   |   |   |           |   |   |   |   |    |   |   |   |   |    |   |   |   |   |    |   |   |   |   |    |   |   |   |   |   |   |   |   |   |   |   |   |   |   |   |   |   |   |   |   |   |   |   |   |   |   |   |   |   |   |   |   |   |   |   |   |   |   |   |   |   |   |   |   |   |   |   |   |   |   |   |   |



## V

|           |                                     |                             |                          |                                  |                     |
|-----------|-------------------------------------|-----------------------------|--------------------------|----------------------------------|---------------------|
| GhCLE28.1 | SSSRLVVMLSFIIIVLMLVMNTEARP          | ---YGHGPHGNPTMAEKIDGMTMLEKL | -GYDLSKIDYYRR-           | -MLSSSPERI                       | SPGGDPQHYY          |
| GhCLE28.2 | SSSRLVVMLSFIIIVLMLVMNTEARP          | ---YGHGPHGNPTMAEKIDGMTMLEKL | -GYDLSKIDYYRR-           | -MLSSSPERI                       | SPGGDPQHYY          |
| GaCLE28   | SSSRLVVMLSFIIIVLMLVMNTEARP          | ---YGHGPHGNPTMAEKIDGMTMLEKL | -GYDLSKIDYYRR-           | -MLSSSPERI                       | SPGGDPQHYY          |
| GrCLE28   | SSSRLVVMLSFIIIVLMLVTNTEARP          | ---YGHGPHGNPTMAEKIDGMTMLEKL | -GYDLSKIDYYRR-           | -MLSSSPERI                       | SPGGDPQHYY          |
| GhCLE44   | -MPNSTIIQASLVIFLILSGNAINIL          | ---EAKSYGGRKTMQKRIDSRSI     | IKALTGYDLSAMKHDGR-       | -RVLTDVSR                        | SPGGDPQHD-          |
| GaCLE53   | -MPNSTIIQASLVIFLILSGNAINIL          | ---EAKSYGGRKTMQKRIDSRSI     | IKALTGYDLSAMKHDGR-       | -RVLTDVSR                        | SPGGDPQHD-          |
| GhCLE45   | -MPNSTVIQASLVIFLILSGNAISIL          | ---EAKSYGGRKTMQKRIDSRSI     | IKALTGYDLSAMKHDGR-       | -RVLTDVSR                        | SPGGDPQHD-          |
| GhCLE29.1 | ISTATTSSSLTMARLSFLAFAFFVVL          | ---LMSSSQAQSLVQKKISSRLLREL  | -GYDRNKLEHYRQVFALKAD     | SDRV                             | SPGGPDHEHA          |
| GhCLE29.2 | ISTATTSSSLTMARLSFLAFAFFVVL          | ---LMSSSQAQSLVQKKISSRLLREL  | -GYDRNKLEHYRQVFALKAD     | SDRV                             | SPGGPDHEHA          |
| GrCLE29   | -----MARLSFLAFAFFVVL                | ---LMSSSQAQSLVQKKISSRLLREL  | -GYDRNKLEHYRQVFALKAD     | SDRV                             | SPGGPDHEHA          |
| GaCLE29   | -----MARLSFLAFAFFVVL                | ---LMSSSQAQSLVQKKISSRLLREL  | -GYDRNKLEHYRQVFALKAD     | SDRV                             | SPGGPDHEHA          |
| GhCLE37   | MPKSSITLPSTSI AFLIL                 | ---FFMLH---                 | MSCDARILKI               | PETHMHKQFLHLKLGFDLHQLKRYENNSTHVP | ISDRVSPGGDPQHFF     |
| GrCLE37   | MPKSSITLPSTSI AFLIL                 | ---FFMLH---                 | MSCDARILKI               | PETHMHKQFLHLKLGFDLHQLKRYENNSTHVP | ISDRVSPGGDPQHFF     |
| GaCLE37   | MPKSSITLPSTSI AFLIL                 | ---FFMLH---                 | MSCDARILKI               | PETHMHKQFLHLKLGFDLHQLKRYENNSTHVS | ASDRVSPGGDPQHFF     |
| GhCLE36   | -----MF-----LIILASITLSSCHF          | -AEERSNTEFHT-               | -WHLP                    | AKSPSSRAEK-DQPVYQV               | -----SYRTVPGGPNPLHN |
| GaCLE36   | NPKSSFMF-----LMIIILASITLSSCHF       | -AEERSNTEFHT-               | -WHLP                    | AKSPSSRAEK-DQPVYQV               | -----SYRTVPGGPNPLHN |
| GrCLE36   | NPKSSFMF-----LMIIILASITLSSCHF       | -AEERSNTEFHT-               | -WHLP                    | AKSPSSRAEK-DQPVYQV               | -----SYRTVPGGPNPLHN |
| GhCLE19.2 | NPKFSFLLFIIIIILSSTIFSSCRYI          | -DEQPSKTDFFA-               | -WHFPTKSSE-              | ESKAEK-SRPIHEV                   | -----SYRTVPGGPNPLHN |
| GaCLE19   | NPKFSFLLFIIIIILSSTIFSSCRYI          | -DEQPSKTDFFA-               | -WHFPTKSSE-              | ESKAEK-SRPIHEV                   | -----SYRTVPGGPNPLHN |
| GrCLE19   | NPKFSFLLFIIIIILSSTIFSSCRYI          | -DEQPSKTDFFA-               | -WHFPTKSSE-              | ESKAEK-SRPIHEV                   | -----SYRTVPGGPNPLHN |
| GhCLE19.1 | NPKFSFLLFIIIIILSSTIFSSCRYI          | -DEQPSKTDFFA-               | -WHFPTKSSE-              | ESKAEK-SRPIHEV                   | -----SYRTVPGGPNPLHN |
| GrCLE46   | NPKFIFIF-----FTIIFSTILSSCRRY        | -EPTTMAAELSTTWFFH           | PAKSPQPSVAEKISRPIYEV     | -----SYRTVPGGPNPLHN              |                     |
| GaCLE46   | NPKFIFIF-----FTIIFSTILSSCRRY        | -EPTTMAAELSTTWFFH           | PAKSPQPSVAEKSSRPIYEV     | -----SYRTVPGGPNPLHN              |                     |
| GrCLE47   | TPKFLFIF-----FTIILSNILSSCRRH        | -EPTPMAAAEQ---              | -HFP-----RPSVAEK-GQPIYEV | -----SYRAVPGGPDPLHN              |                     |
| GaCLE47   | SPKFLFIF-----FTIILSNILSSCRRY        | -EPTPMAAAEQ---              | -HFP-----QPSVAEK-GQPIYEV | -----SYRTVPGGPDPLHN              |                     |
| GhCLE17.2 | SSYISQFI---VVLIIILGFVVTSSRYVRLDKYSP | IFLT---                     | SLSAIRSLGKSPASDKIRA-VHAV | -----SHRVVPGGPNQLHN              |                     |
| GaCLE17   | SSYISQFI---VVLIIILGFVVTSSRYVRLDKYSP | IFLT---                     | SLSAIRSLGKSPASDKIRA-VHAV | -----SHRVVPGGPNQLHN              |                     |
| GhCLE17.1 | PSYLSQFL---VVLIIILGFVVASSRYVRLDKYSP | IFLT---                     | SLSAIRSLGKSPASDKIRA-VHAV | -----SHRVVPSGPNQLHN              |                     |
| GrCLE17   | PSYISQFL---VVLIIILGFVVASSRYVRLDKYSP | IFLT---                     | SLSAIRSLGKSPASDKIRA-VHAV | -----SHRVVPSGPNQLHN              |                     |
| GhCLE41   | KNTLVMFL---VFLIIILGFVVTSCRHRLDRYSP  | MFRL---                     | SFTVIHGRGPIRKPTSSSVHVV   | -----SRLLVPGGPNPLHN              |                     |
| GrCLE51   | ENTLVMFL---VFLIIILGLMVTSCRHRLDRYSP  | MFRL---                     | TFTVIHGRGPIGKPTSSSVHVV   | -----SHRLVPGGPNPLHN              |                     |
| GhCLE18.2 | PSPFLLLL---ILAVMLATVLSSCRQL---      | -YQQTKFSAH---               | -HFSSSYYASVSGNSNKYTAADV  | -----SHKVVPGGPNPLHN              |                     |
| GaCLE18   | HSPFLPLL---ILAVMLATVLSSCRQL---      | -YQQTKFSAH---               | -HFSSSYYASVSGNSNKYTAADV  | -----SHKVVPGGPNPLHN              |                     |
| GhCLE18.1 | PSPFLPLL---ILAVMLATVLSSCRQL---      | -YQQTKFSAH---               | -HFTSSYYASVSGNNNKYTAADV  | -----SHKVVPGGPNPLHN              |                     |
| GrCLE18   | PSPFLPLL---ILAVMLATVLSSCRQL---      | -YQQTKFSAH---               | -HFTSSYYASVSGNNNKYTAADV  | -----SHKVVPGGPNPLHN              |                     |
| GaCLE51   | LSPFLPLV---ILAVLATLTSSCRQI---       | -YYQTQPNL---                | -----RSKYEAVHGV          | -----SHLLVPGGPNPLHN              |                     |



## IV

|           |                                                                                             |
|-----------|---------------------------------------------------------------------------------------------|
| GhCLE51   | NSNPPQAPSGFNVIVKRETPGGPNPLVIVKRETPGGPNPLHHSNPPLAPSGGFNVIVKRETPGGPNAPSGGFNVIVKRETPGGPNPLHNS  |
| NhCLE52   | NSNPLQVPSPGFNIIVKRETPGGPNPLVIVKRETPGGPNPLHDSNSLQAPSGGFNVIVKRETLGGPNAPSGGFNVIVKRETPGGPNPLHDS |
| GhCLE53   | NSNPPLALSGFNVIVKREAPRGPNSL--IIRETPGDPNPLHNSNPPLAPSGGLNIIMKRETLGGSNAPSGGFNVIVKRETPGGPNPLHNS  |
| GhCLE54   | NSNPLLASTGFNIIVKREAPGGPNPLIIVKREAPGGPNPIQNSNPLLALSGGFNVIVKRETPGGPNAPSGGFNVIVKRETPRGPNPLHNS  |
| GhCLE35.2 | GSSLLFRTLFGTLIVLGFILGIVSGF--HQSSTTTAKVQHEEEQVKVLGQRKSNVAH-----PKQDLNYSKRRVPNGPDP IHNH       |
| GaCLE35   | GSSLLFRTLFGTLIVLGFILGIVSGF--HQSSTTTAKVQHEEEQVKVLGQRKSNVAH-----PKQDLNYSKRRVPNGPDP IHNH       |
| GhCLE35.1 | GSSLLFRTLFGTLIVLGFILGIVSGF--HQSSTTTAKVQHEEEQVKVLGQGVKSNVAH-----PKQDLNYSKRRVPNGPDP IHNH      |
| GrCLE35   | GSSLLFRTLFGTLIVLGFILGIVSGF--HQSSTTTAKVQHEEEQVKVLGQGVKSNVAH-----PKQDLNYSKRRVPNGPDP IHNH      |
| GrCLE55   | GVSLSFKTLFRTLIVLGFII---VGT-----QVKDLGKGKSTLVH-----QRLDLNYSKRRVPNGPDP IHNH                   |
| GaCLE56   | GGSLSFKTLFRTLIVLGFII---VGT-----QVKDLGKGKSTLVH-----QRLDLNYSKRRVPNGPDP IHNH                   |
| GhCLE38   | KSGRALRCFFAVAVLVGVVWLLFVSI-----VSSTEDLKHWEFVV-----DDFHNYSKRRVPNGPDP IHNH                    |
| GaCLE38   | KSGKALRCFFAVAVLVGVVWLLFVSI-----VSSTEDLKHWEFVV-----DDFHNYSKRRVPNGPDP IHNH                    |
| GrCLE38   | KSGRALRCFFAVAVLVGVVWLLFVSI-----VSSTEDLKHWEFVV-----DDFHNYSKRRVPNGPDP IHNH                    |
| GhCLE46   | CSSQRVLLFLIFFGLLAIQADKVCGL-----TRKAV-EMKEMRTEQK-PLPVN-----NKTDPNESKRRVRRGSDP IHNH           |
| GhCLE47   | CSSQRVLLFLIFFGLLAIQADKVCGL-----GKGIVTRKAV-EMKEMRTEQK-PLPVN-----NKTDPNESKRRVRRGSDP IHNH      |
| GrCLE53   | CSSQRVLLFLIFFGLLAIQADKVCGL-----GKGIVTRKAV-EMKEMRTEQK-PLPVN-----NKTDPNESKRRVRRGSDP IHNH      |
| GaCLE54   | CSSQRVLLFLIFFGLLAIQADKVCGL-----TRKAV-EMKEMRTEQK-PLPVN-----NKTDPNESKRRVRRGSDP IHNH           |
| GhCLE32.2 | CSAQRFLMFLICFGLLAVAPDKASGL--AIRTNQRIKAA-DMKGTRIEKKLPEVVN-----NTFDPNRSKRRVRRGSDP IHNH        |
| GaCLE32   | CSAQRFLMFLICFGLLAVAPDKASGL--AIRTNQRIKAA-DMKGTRIEKKLPEVVN-----NTFDPNRSKRRVRRGSDP IHNH        |
| GhCLE32.1 | SSAQRFLMFLICFGLLAVAPDKAYGL--AIRTNQRIKAA-DMKGMSTENKLPEVVN-----NTFDPNRSKRRVRRGSDP IHNH        |
| GrCLE32   | SSAQRFLMFLICFGLLAVAPDKAYGL--AIRTNQRIKAA-DMKGMSTENKLPEVVN-----NTFDPNRSKRRVRRGSDP IHNH        |
| GhCLE33.2 | CSAQRVILLIFLGLLALQPVESVSGL-----SQRVLKAV-DTKGMSTEKK-PAFVN-----NKFDPNRSTKRRVRRGSDP IHNH       |
| GaCLE33   | CSAQRVILLIFLGLLALQPVESVSGL-----SQRVLKAV-DTKGMSTEKK-PAFVN-----NKFDPNRSTKRRVRRGSDP IHNH       |
| GhCLE33.1 | CSAQRVILLIFLGLLALQPVESVSGL-----SQRVLKAV-DTKGMSTEKK-PAFVN-----NKFDPNRSTKRRVRRGSDP IHNH       |
| GrCLE33   | CSAQRVILLIFLGLLALQPVESVSGL-----SQRVLKAV-DTKGMSTEKK-PAFVN-----NKFDPNRSTKRRVRRGSDP IHNH       |
| GhCLE34.2 | CSRQRVVMFLIFFGLLT IQPCRVCGL---SKNGRVLKAVVDMKG INTEKK-ASAVN-----NRFDPNQSSKRRFRRGSDP IHNH     |
| GaCLE34   | CSRQRVVMFLIFFGLLT IQPCRVCGL---SKNGRVLKAVVDMKG INTEKK-ASAVN-----NRFDPNQSSKRRFRRGSDP IHNH     |
| GhCLE34.1 | CSRQRVVMFLIFFGLLT IQPCRVCGL---SRNERVLKAVDMKG INTEKK-ASAVN-----NRFDPNQSSKRRFRRGSDP IHNH      |
| GrCLE34   | CSRQRVVMFLIFFGLLT IQPCRVCGL---SRNERVLKAVDMKG INTEKK-ASAVN-----NRFDPNQSSKRRFRRGSDP IHNH      |
| GhCLE49   | GGNSRGFIV I-----V IACC-AFVGRSGIVKAVVTVEALQTRQDLGPVSSSSSSSS--VMFDPNRSNKRKIKRGSDP IHDR        |
| GhCLE50   | GGNSRGFIV I-----V IACC-AFVGRSGIVKAVVTVEALQTRQDLGPVSSSSSSSSSS--VMFDPNRSNKRKIKRGSDP IHDR      |
| GhCLE48   | -----M-PLVENSRIIRAVGSVDSLQTPPSLAPAPS-----IMFDPNRSNKRKSVKKGSDP IHNH                          |
| GrCLE54   | SVNTRGFILVSCIALLVFQTEIVSAM-PLVENSRIIRAVGSVDSLQTPPSLAPAPS-----IMFDPNRSNKRKSVKKGSDP IHNH      |
| GaCLE55   | SVNTRGFILVSCIALLVFQTEIVSAM-PLVENSRIIRAVGSVDSLQTPPSLAPAPS-----IMFDPNRSNKRKSVKKGSDP IHNH      |
| GhCLE7.2  | VLNSSMVVMLIISVLQIWIICSDCRAG---EMRKMIERKELFQTYFNGTS--FSFKGGDKGFED-----SKRRVPSCDP LHN-        |
| GaCLE7    | VLNSSMVVMLIISVLQIWIICSDCRAG---EMRKMIERKELFQTYFNGTS--FSFKGGDKGFED-----SKRRVPSCDP LHN-        |
| GhCLE7.1  | VLNSSMVVMLIISVLQIWIICSDCRAG---EMRKMIAQELFQTYFNGTS--FSFKGSDKGFED-----SKRRVPSCDP LHN-         |
| GrCLE7    | VLNSSMVVMLIISVLQIWIICSDCRAG---EMRKMIERQELFQTYFNGTS--FSFKGSDKGFED-----SKRRVPSCDP LHN-        |
| GhCLE6.2  | MVSKGLIGYVLLIMLSISALKNGVMG----EKVEDEEKT-ERSWKDQN--LDNGS-DGFFAT-----INREVPSCDP LHNK          |
| GaCLE6    | MVSKGLIGYVLLIMLSISALKNGVMG----EKVEDEEKT-ERSWKDQN--LDNGS-DGFFAT-----INREVPSCDP LHNK          |
| GrCLE6    | MVSKGLIGYVLLIMLSISALKNGVVG----EKVEDEEKT-ERSWKDQN--LDNGS-DGFFAT-----INREVPSCDP LHNK          |
| GhCLE6.1  | MVSKGLIGYVLLIMLSISALKNGVVG----EKVEDEEKT-ERSWKDQN--LENGS-DGFFAT-----INREVPSCDP LHNK          |
| GhCLE8.2  | ---MSISLSFWCFGLWNFLTGCVSIG---EKPAQNRKILHADLKENNGSTTGAGNMENFVGW-----ELRAVPSGDP LHHN          |
| GhCLE8.1  | ---MSISLSFWCFGLWNFLTGCVSIG---EKPAQNRKILHADLKENNGSTTGAGNMENFVGW-----ELRAVPSGDP LHHN          |
| GrCLE8    | LVTTRALVLALLYLLVLQGVCGCVSG---EKPAQNRKILHADLKENNGSTTGAGNMENFVGW-----ELRAVPSGDP LHHN          |
| GaCLE8    | LVTTRALVLALLYLLVLQGVCGCVSG---EKPAQNRKILHADLKENNGSTTGAGNMENFVGW-----ELRAVPSGDP LHHN          |
| GhCLE31   | SLQVGLLQTLMMGMVLVSVFVSVSGY-----KGHNPPHDKHKQPVKVKQHHQRFR-----HSFDVFYSKREVPNASDPLHNH          |
| GaCLE31   | -----MMQMLVLVSVFVSVSGY-----KGHNPPHDKHKQPVKVKQHHQRFR-----HSFDVFYSKREVPNASDPLHNH              |
| GrCLE31   | -----MMRILVLVSVFVSVSGY-----KGHNPPHDKHKQPVKVKQHHQRFR-----HSFDVFYSKREIPNALAPLHNH              |
| GhCLE30.1 | --MLRLLRILMVVMLLSSMLISAD-----TTNAHSPVSNEKIPMDKQQQPQSLR-----GSFGVFFSSKRRKVPNAADPLHNH         |
| GaCLE30   | --MLRLLRILMVVMLLSSMLISAD-----TTNAHSPVSNEKIPMDKQQQPQSLR-----GSFGVFFSSKRRKVPNAADPLHNH         |
| GhCLE30.2 | --MLRLLRILMVVMLLSSMLISAD-----TTNAHSPVSNEKIPMDKQQQPQSLR-----GSFGVFFSSKRRKVPNAADPLHNH         |
| GrCLE30   | --MLRLLRILMVVMLLSSMLISAD-----TTNAHSPVSNEKIPMDKQQQPQSLR-----GSFGVFFSSKRRKVPNAADPLHNH         |

## III



|          |                                          |                                   |                            |                   |
|----------|------------------------------------------|-----------------------------------|----------------------------|-------------------|
| GrCLE41  | K----                                    | LICFYLLLLLYFQFSSCSFQLMPVKSH-----  | GGFEANDDDDHGDEGEDFGD-----  | EKRKVYTGPNPLHNR   |
| GaCLE41  | K----                                    | LICFYLLLLLYFQFSSCSFQLMPVESH-----  | GGFEANDDDDHGDEGEDFGD-----  | EKRKVYTGPNPLHNR   |
| GrCLE42  | S----                                    | LLLLLLLLLL-QFEYAGG--GGSNGEQK----- | SPKF IKSQKNGDD--IFAA-----  | QQRKVYTGPNPLHNR   |
| GaCLE42  | S----                                    | LLLLLLLLLLQFEYAGG--GGSNGEQK-----  | SPKF IKSQKNGDD--IFAA-----  | QQRKVYTGPNPLHNR   |
| GrCLE1   | MRDHVLIYLLLAWLLLIHYRAIDSV-----           | FSTR-----                         | RSLMPRSRVRNALPTWVEMK-----  | KIHKSPSSPNPVKNR   |
| GaCLE1   | MRDHVLIYLLLAWLLLIHY-----                 | M-----FSTR-----                   | RSLMPRSRVRNALPTWVEMK-----  | KIHKSPSSPNPVKNL   |
| GbCLE1   | MREQLLICLLLAWLLAVSVQAIESG-----           | YFLS-----                         | RSPMPRPR-----LPNWVEMK----- | KIHKSPSGPNPVGNH   |
| GrCLE39  | NIQV-LAYMIFAFLLLSAS-LRIPAI-----          | LKIS-----                         | TARQTQNP SNRFSLAWVKDD----- | NMRKVPSAPNP SGNR  |
| GaCLE39  | NIQV-LAYMIFAFLLLSAS-LRIPAI-----          | FSIS-----                         | TARQTQNP SNRFSLAWVKD-----  | NMRKVPSAPNP I GNR |
| GrCLE40  | KVQVMLAYLLIVFLLLPSS--SIPMQ-----          | MKTR-----                         | PPKPNRFLLAAWEHGTNVKG-----  | NMKKVPSAPNP KGNL  |
| GaCLE40  | KVQVMLAYLLIVFLLLPSS--SIPMQ-----          | GK-----                           | LPKPNRFLLAAWEHGTNVKG-----  | NMKKVPSAPNP KGNR  |
| GbCLE2   | KPHFFLLFLTIVFLVFLLL INSSNVTSSSSTMNL----- | PPKQRRHPRTSASS--FGA-----          | EAHEVPSGPNP ISNR           |                   |
| GaCLE2   | KPHFFLLFLTIVFLVFLLL INSSNVTSSSSTMNL----- | PPKQRRHPRTSASS--FGA-----          | EAHEVPSGPNP ISNR           |                   |
| GrCLE2   | KPHFFPLFLTIVFLVFLLL INSSNVTSSSSTMNL----- | PPKQRRHPRTSASS--FGA-----          | EAHEVPSGPNP ISNR           |                   |
| GbCLE39  | -----                                    | MDSPNGTDASSNMNL-----              | HPKQTRTLGTSSSSSRREFGA----- | EAHEVPSGPNP ISNR  |
| GaCLE49  | -----                                    | MDSPNGTDASSNMNL-----              | HPKQTRTLGTSSSSSRREFGA----- | EAHEVPSGPNP ISNR  |
| GrCLE49  | KSHSLFLLTLFFIFLLLLMDSPNGTDASSNMNL-----   | HPKQTRTLGTSSSSSRREFGA-----        | EAHEVPSGPNP ISNR           |                   |
| GbCLE40  | KSHSLFLLTLFFIFLLLLMDSPNGTDASSNMNL-----   | HPKQTRTLGTSSSSSRREFGA-----        | EAHEVPSGPNP ISNR           |                   |
| GbCLE3   | KSQFFIVFLTTLFFISLLIFINSS--PTSSTMEI-----  | NQSPNPHTSSSSSSRGQFGG-----         | EAHEVPSGPNP ISNR           |                   |
| GaCLE3   | KSQFFIVFLTTLFFISLLIFINSS--PTSSTMEI-----  | NQSPNPHTSSSSSSRGQFGG-----         | EAHEVPSGPNP ISNR           |                   |
| GrCLE3   | KSQFFIIFLTTLFFISLLIFINSS--PTSSTMEI-----  | NQSPNPHTSSSSSSRRQIGG-----         | EAHEVPSGPNP ISNR           |                   |
| GbCLE5.2 | NTHFTLLFILLLLLVSPVFSSSCYGQKPPASNSHP----- | FPAPTTAAAEQSPRDRRFKG-----         | AAHEVPSGPNP ESN-           |                   |
| GaCLE5   | NTHFTLLFILLLLLVSPVFSSSCYGQKPPASNSHP----- | FPAPTTAAAEQSPRDRRFKG-----         | AAHEVPSGPNP ESN-           |                   |
| GbCLE5.1 | NTHFTLLFILLLLLVSPAFSSCYDQKPPASNSHP-----  | FPAPTTAAAEQSPRDRRFKG-----         | AAHEVPSGPNP ESN-           |                   |
| GrCLE5   | NTHFTLLFILLLLLVSPVFSSSCYDQKPPASNSHP----- | FQAPTIAAAEQSPRDRRFKG-----         | AAHEVPSGPNP ESN-           |                   |
| GbCLE4.2 | SCALLQLFLLLLLLISPLFSSSSTTR-----          | IPAAQTPGKNGAT-DGRFEA-----         | DVHEVPSGPNP ESNK           |                   |
| GaCLE4   | SCALLQLFLLLLLLISPLFSSSSTTR-----          | IPAAQTPGKNGAT-DGRFEA-----         | DVHEVPSGPNP ESNK           |                   |
| GbCLE4.1 | SCALLQLLVLLLLLLISPLFSSSSTTR-----         | IPAAQSPGKNGAT-DGRFEA-----         | DVHEVPSGPNP ESNK           |                   |
| GrCLE4   | SYALLRLFVLLLLLLISPLFSSSSTTR-----         | IPAAQSPGKNGAT-DGRFEA-----         | DVHEVPSGPNP ESNK           |                   |

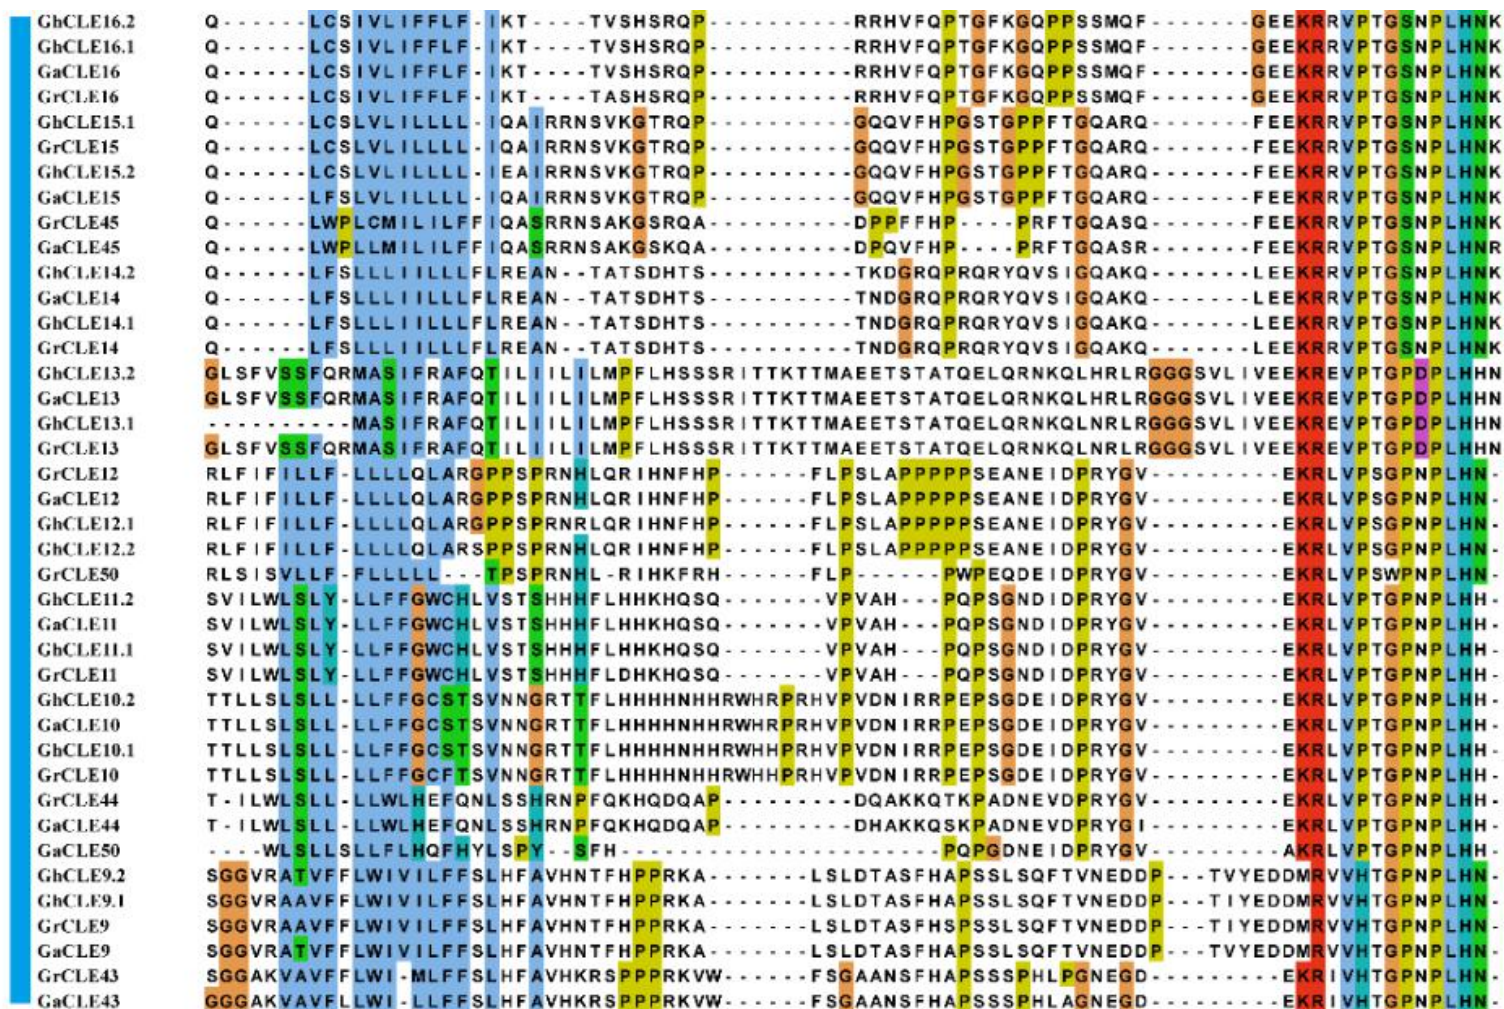

**Supplementary Figure 3.** Multiple sequence alignment of *G.hirsutum*, *G.arboreum*, and *G.raimondii* CLE pre-propeptides was performed using the ClustalX program. The CLE domain contains 14 amino acids, and the leucine-rich region in the signal peptide region is the most conserved in the whole pre-propeptide family.



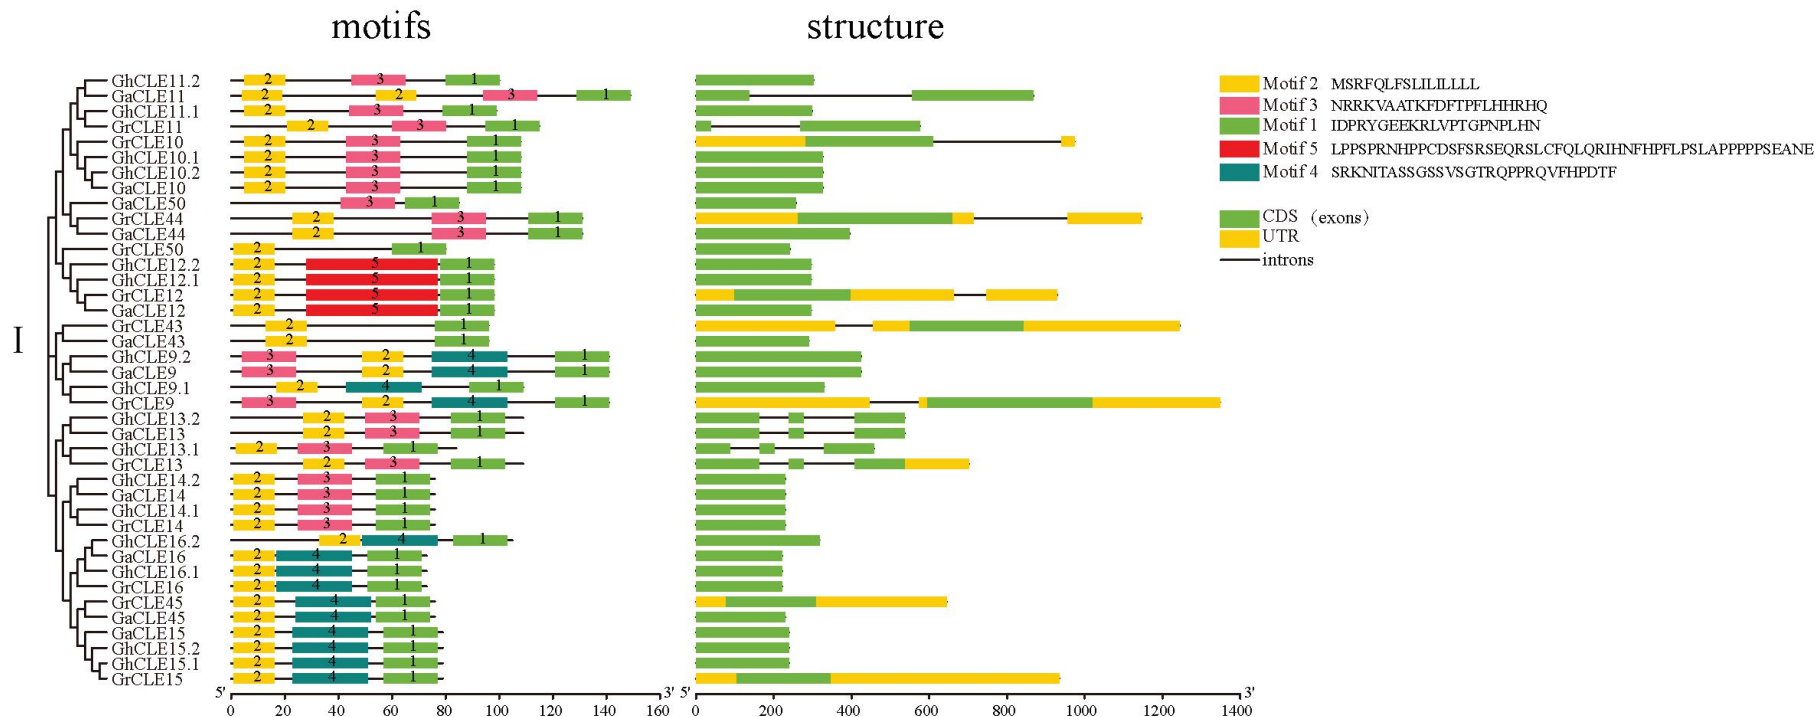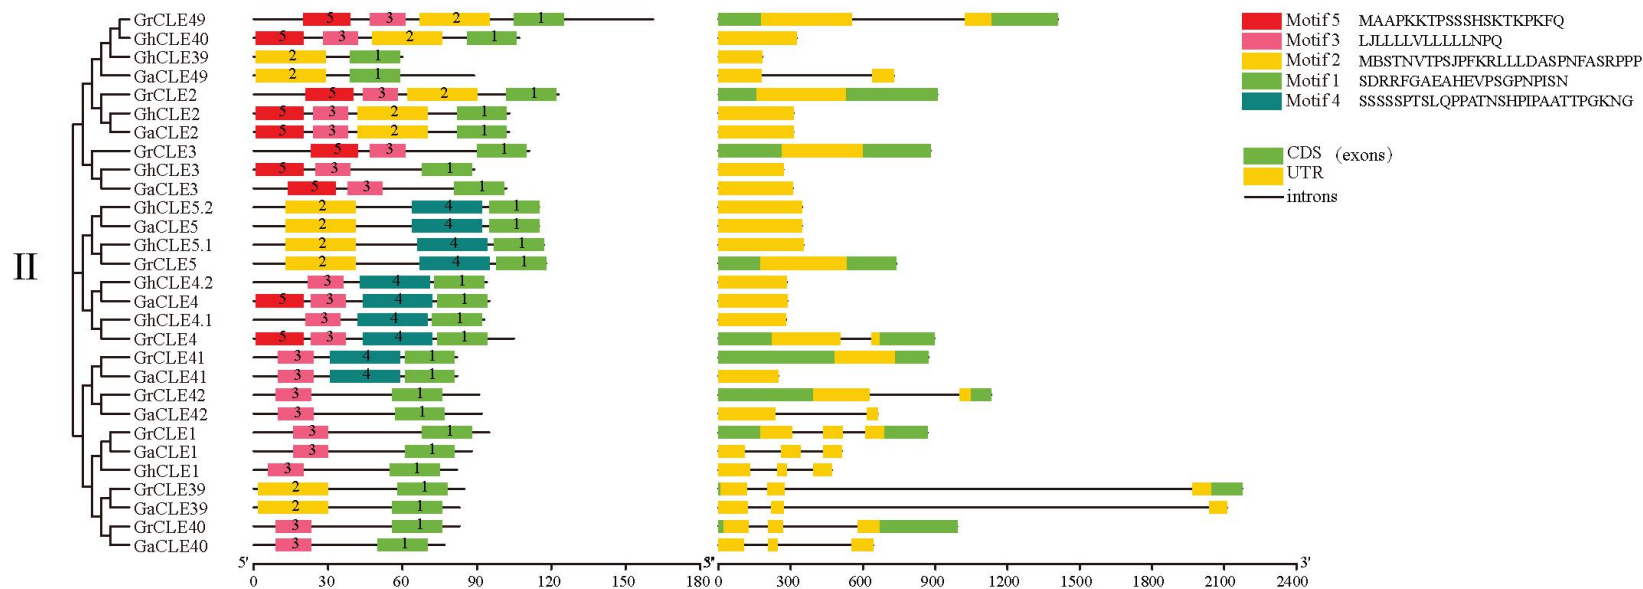

III

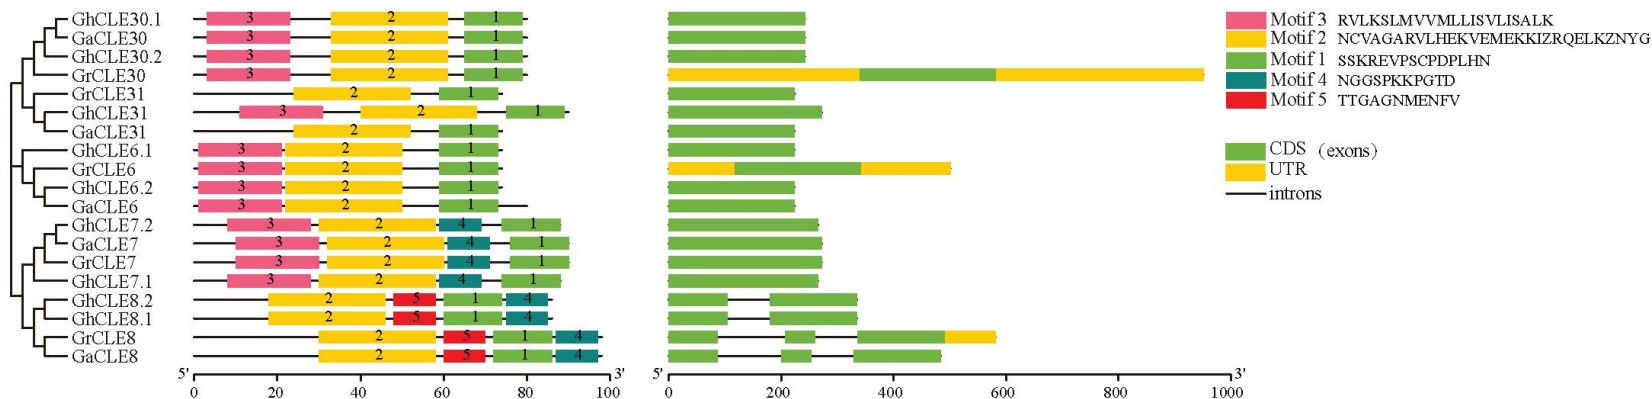

IV

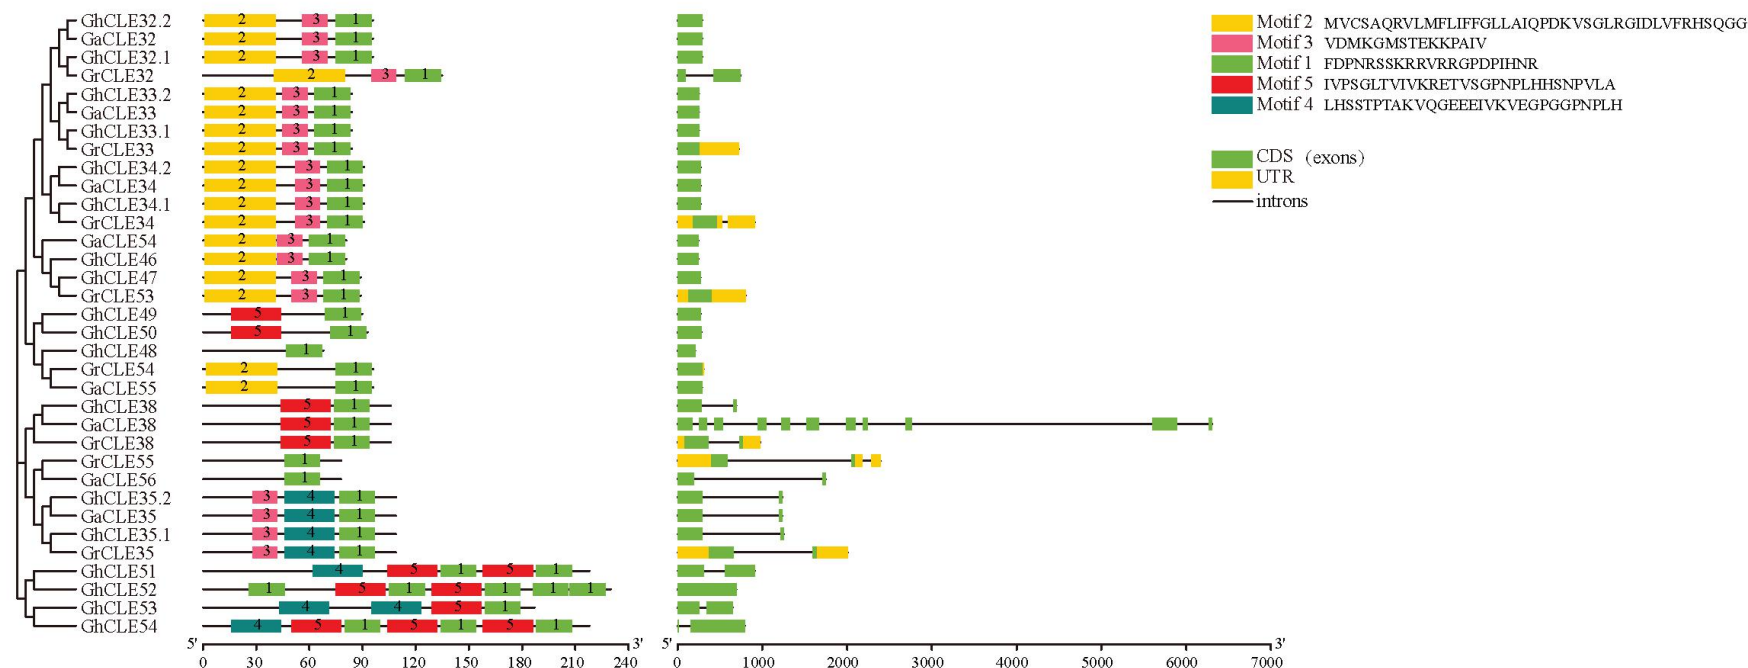



## VI

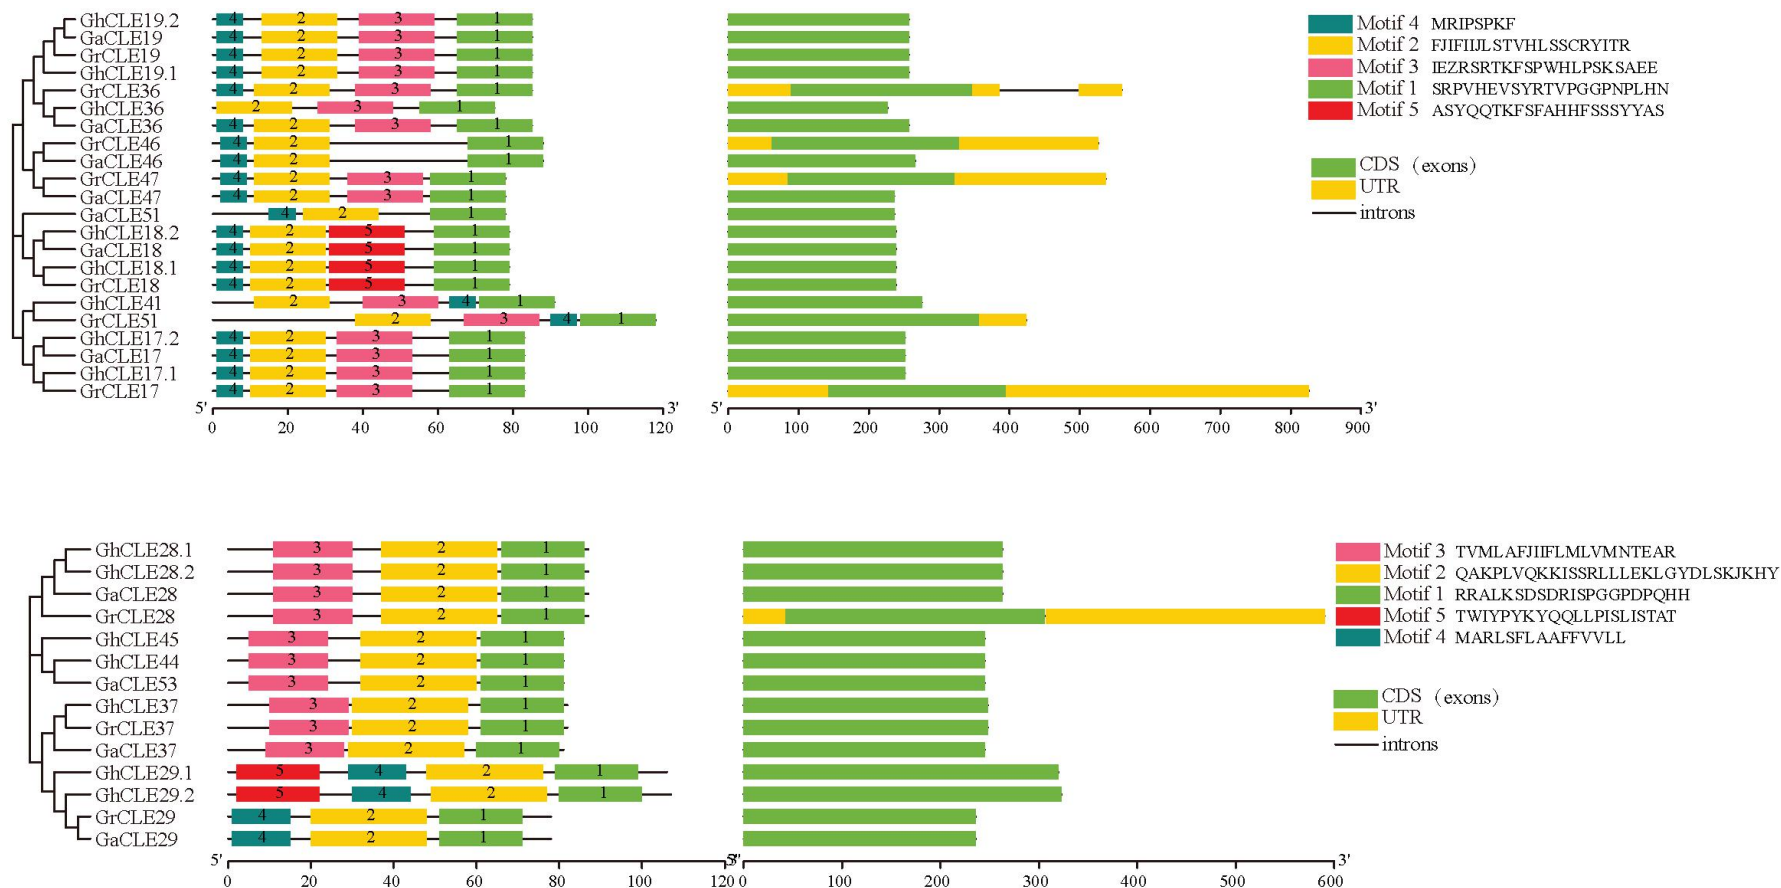

VII

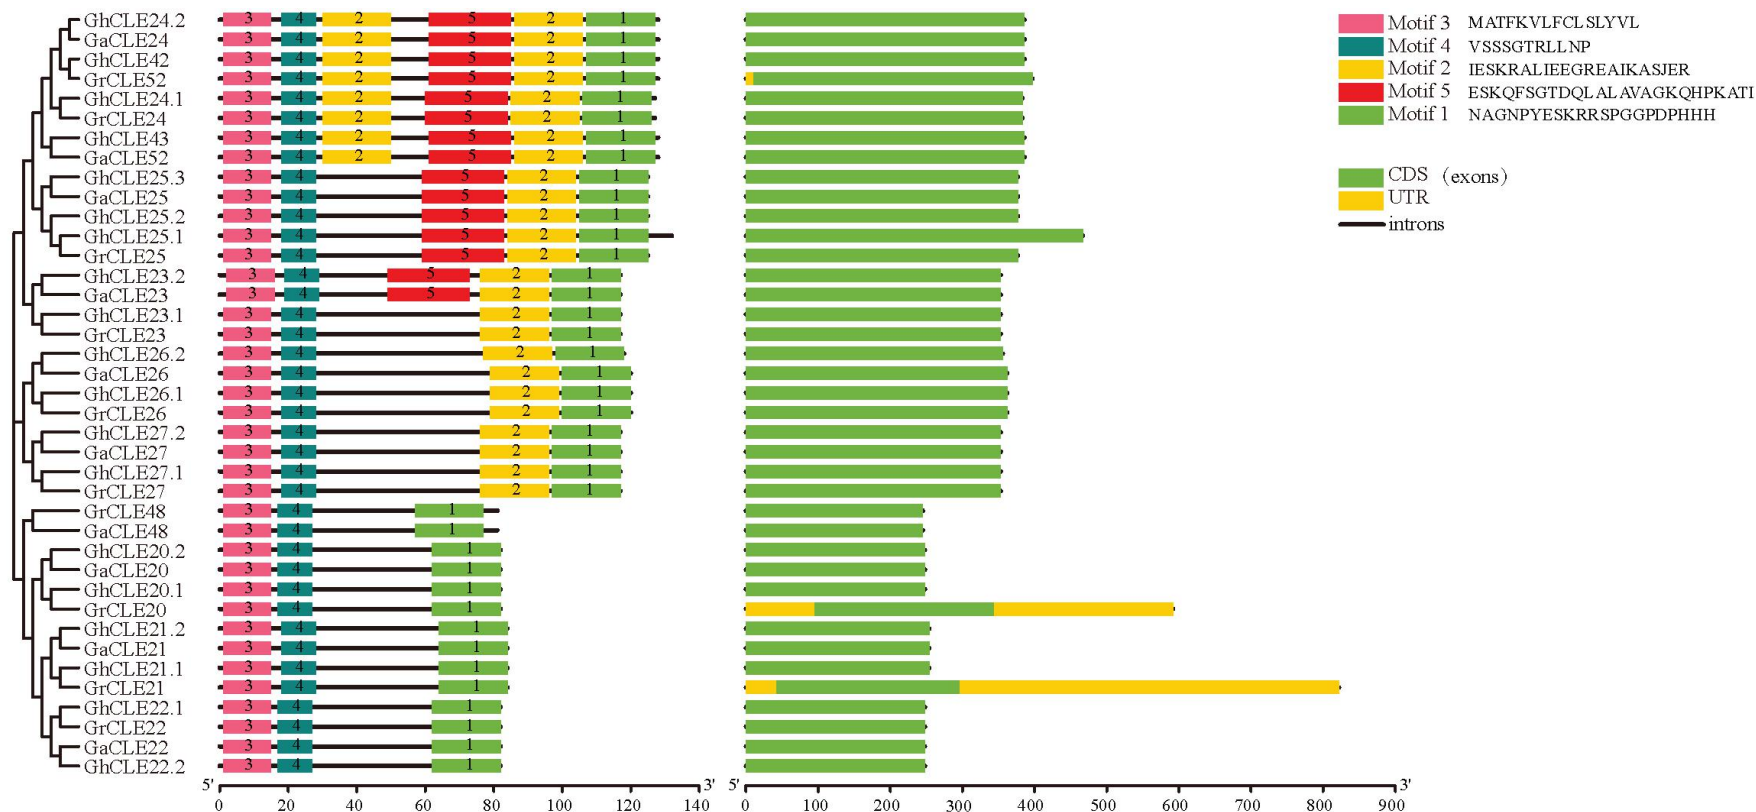

**Supplementary Figure 4.** Gene structure and conserved motifs of seven groups in *G.hirsutum*, *G.arboreum*, and *G.raimondii* were illustrated by GSDS 2.0 and MEME. In gene structure diagrams, green boxes stand for exons; black lines for introns; yellow boxes for UTR. Five conserved motifs of each group were identified. Different color boxes with number represented different motifs.
