# Supplementary material for: Molecular Traits and Functional Analysis of the CLAVATA3/Endosperm Surrounding Region-Related Small Signaling Peptides in Three Species of Gossypium Genus
Source: Front Plant Sci. 2021 Jun 4;12:671626. doi: 10.3389/fpls.2021.671626 (PMC8213210; doi:10.3389/fpls.2021.671626)
Supplement: Supplementary file 2 [file Data_Sheet_2.xlsx]

## Sheet: Table1
Table 1. Characteristics of CLE genes from G. raimondii. SP: position of Signal peptide sequence; AA: Amino acid; pI: The theoretical isoelectric point of proteins; Mw: The theoretical molecular weight of proteins.
Gene name	Gene ID	AA	pI	Mw	SP	Subcellular localization	Gene name	Gene ID	AA	pI	Mw	SP	Subcellular localization
GrCLE1	Gorai.003G134200.1	95	11.33	11.06	1—33	Extracellular	GrCLE29	Gorai.006G002700.1	78	9.98	8.89	1—21	Extracellular
GrCLE2	Gorai.001G186300.1	123	9.65	13.85	NO	PlasmaMembrane	GrCLE30	Gorai.010G023900.1	80	10.51	8.96	1—23	Extracellular
GrCLE3	Gorai.007G153500.1	111	8.8	12.12	NO	PlasmaMembrane	GrCLE31	Gorai.009G216600.1	74	10.28	8.67	1—15	Mitochondrial
GrCLE4	Gorai.011G159800.1	105	6.38	11.35	NO	Extracellular	GrCLE32	Gorai.009G324600.1	135	10.27	15.19	NO	Nuclear
GrCLE5	Gorai.006G221500.1	118	8.8	12.16	1—36	Nuclear	GrCLE33	Gorai.008G181100.1	84	11.45	9.57	1—27	Extracellular
GrCLE6	Gorai.007G296300.1	74	5.24	8.17	1—26	Extracellular	GrCLE34	Gorai.012G187200.1	91	11.2	10.46	1—25	Extracellular
GrCLE7	Gorai.005G190400.1	90	9.35	10.42	1—35	PlasmaMembrane	GrCLE35	Gorai.002G165000.1	109	9.89	11.76	NO	Extracellular
GrCLE8	Gorai.006G114900.1	98	8.82	10.43	1—30	Extracellular	GrCLE36	Gorai.003G160300.1	85	8.93	9.79	1—26	Extracellular
GrCLE9	Gorai.005G160900.4	141	8.98	15.75	NO	PlasmaMembrane	GrCLE37	Gorai.006G002100.1	82	8.98	9.41	1—28	Mitochondrial
GrCLE10	Gorai.007G007600.1	108	9.42	12.44	1—31	Extracellular	GrCLE38	Gorai.001G257800.1	106	11.47	11.96	NO	Mitochondrial
GrCLE11	Gorai.001G045900.1	115	8.83	13.27	NO	Extracellular	GrCLE39	Gorai.010G202200.1	85	10.11	9.57	1—28	Extracellular
GrCLE12	Gorai.005G144400.1	98	9.1	11.12	1—22	Extracellular	GrCLE40	Gorai.011G256400.1	83	10.42	9.31	1—24	Extracellular
GrCLE13	Gorai.004G092000.1	109	9.3	12.29	NO	Extracellular	GrCLE41	Gorai.004G015200.1	82	5.82	9.33	1—27	Nuclear
GrCLE14	Gorai.004G062300.1	76	11.5	8.78	1—24	Extracellular	GrCLE42	Gorai.013G001300.1	91	9.9	10.29	1—28	Extracellular
GrCLE15	Gorai.007G171200.1	79	11.71	8.88	1—22	Extracellular	GrCLE43	Gorai.008G167000.1	96	11.64	10.71	NO	Mitochondrial
GrCLE16	Gorai.001G095900.1	73	11.89	8.28	1—22	Nuclear	GrCLE44	Gorai.013G079400.1	131	9.67	15.02	NO	Extracellular
GrCLE17	Gorai.004G119100.1	83	10.11	9.21	1—25	Extracellular	GrCLE45	Gorai.001G215800.1	76	11.91	8.87	1—23	Extracellular
GrCLE18	Gorai.006G197600.1	79	9.65	8.75	1—25	Extracellular	GrCLE46	Gorai.007G023000.1	88	9.14	9.99	NO	Extracellular
GrCLE19	Gorai.004G209500.1	85	9.65	9.91	1—24	Extracellular	GrCLE47	Gorai.007G022900.1	78	9.43	8.76	NO	Extracellular
GrCLE20	Gorai.010G242300.1	82	8.82	9.49	1—22	Extracellular	GrCLE48	Gorai.009G164400.1	81	9.74	9.21	1—22	Extracellular
GrCLE21	Gorai.009G164500.1	84	7.81	9.58	1—23	Extracellular	GrCLE49	Gorai.004G225300.1	161	9.23	17.59	NO	PlasmaMembrane
GrCLE22	Gorai.011G033200.1	82	8.71	9.05	1—24	Extracellular	GrCLE50	Gorai.013G091800.1	80	9.74	9.54	1—24	Extracellular
GrCLE23	Gorai.009G372900.1	117	9.51	13.15	1—22	Extracellular	GrCLE51	Gorai.008G278200.1	118	11.26	13.53	NO	Extracellular
GrCLE24	Gorai.002G063800.1	127	6.97	14.05	1—22	Extracellular	GrCLE52	Gorai.002G063700.1	128	8.93	14.21	1—23	Extracellular
GrCLE25	Gorai.002G064000.1	125	7.1	14	1—22	Extracellular	GrCLE53	Gorai.005G141500.1	89	10.42	10.19	1—22	Extracellular
GrCLE26	Gorai.004G030000.1	120	9.73	13.02	1—22	Extracellular	GrCLE54	Gorai.008G193000.1	96	9.89	10.44	NO	Extracellular
GrCLE27	Gorai.004G030100.1	117	9.91	13.15	1—24	Extracellular	GrCLE55	Gorai.005G188200.1	78	11.84	8.78	1—26	Nuclear
GrCLE28	Gorai.002G063600.1	87	6.9	9.68	1—29	Extracellular

## Sheet: Table2
Table 2. Characteristics of CLE genes from G. arboreum. SP: position of Signal peptide sequence; AA: Amino acid; pI: The theoretical isoelectric point of proteins; Mw: The theoretical molecular weight of proteins
Gene name	Gene ID	AA	pI	Mw	SP	Subcellular localization	Gene name	Gene ID	AA	pI	Mw	SP	Subcellular localization
GaCLE1	Ga01G2361	88	11.38	10.41	1—33	Extracellular	GaCLE29	Ga09G0027	78	9.98	8.89	1—21	Extracellular
GaCLE2	Ga07G1763	103	11.04	11.41	NO	PlasmaMembrane	GaCLE30	Ga06G0234	80	10.15	8.91	1—21	Extracellular
GaCLE3	Ga11G2600	102	9.62	11.07	1—17	Extracellular	GaCLE31	Ga05G2210	74	9.9	8.58	1—15	Extracellular
GaCLE4	Ga10G1467	95	6.81	10.04	1—39	Extracellular	GaCLE32	Ga05G3337	96	10.55	10.84	1—27	Extracellular
GaCLE5	Ga09G2281	115	8.84	11.83	1—36	Extracellular	GaCLE33	Ga12G1185	84	11.45	9.58	1—27	Extracellular
GaCLE6	Ga11G0902	80	5.73	8.89	1—26	Extracellular	GaCLE34	Ga14G1701	91	11.23	10.32	1—25	Extracellular
GaCLE7	Ga03G1952	90	9.57	10.39	1—35	PlasmaMembrane	GaCLE35	Ga14G2731	109	10.08	11.88	NO	Extracellular
GaCLE8	Ga09G1158	98	8.82	10.42	1—30	Extracellular	GaCLE36	Ga01G2549	85	8.74	9.69	1—26	Extracellular
GaCLE9	Ga03G1613	141	8.98	15.88	NO	Nuclear	GaCLE37	Ga09G0024	81	8.98	9.17	1—27	Extracellular
GaCLE10	Ga11G4059	108	9.73	12.43	1—31	Extracellular	GaCLE38	Ga07G2513	106	11.03	11.99	NO	Mitochondrial
GaCLE11	Ga07G0473	149	9.63	17.47	1—20	Mitochondrial	GaCLE39	Ga06G2039	83	11.49	8.25	1—28	Extracellular
GaCLE12	Ga03G1427	98	9.1	11.12	1—22	Extracellular	GaCLE40	Ga10G0368	77	10.63	8.55	1—24	Extracellular
GaCLE13	Ga08G0907	109	9.3	12.28	NO	Extracellular	GaCLE41	Ga08G0160	82	5.14	9.24	1—26	Nuclear
GaCLE14	Ga08G0592	76	11.49	8.78	1—24	Extracellular	GaCLE42	Ga13G0014	92	9.9	10.41	1—29	Extracellular
GaCLE15	Ga11G2395	79	11.91	8.93	1—22	Extracellular	GaCLE43	Ga12G1339	96	11.64	10.59	NO	Mitochondrial
GaCLE16	Ga14G0385	73	11.89	8.31	1—22	Extracellular	GaCLE44	Ga13G0839	131	9.67	15.01	NO	Extracellular
GaCLE17	Ga08G1195	83	10.11	9.2	1—25	Extracellular	GaCLE45	Ga07G2139	76	12.18	8.89	1—23	Extracellular
GaCLE18	Ga09G2022	79	9.65	8.75	1—25	Extracellular	GaCLE46	Ga11G3909	88	9.14	9.99	NO	Extracellular
GaCLE19	Ga08G2119	85	9.36	9.85	1—24	Extracellular	GaCLE47	Ga11G3910	78	8.93	8.82	NO	Extracellular
GaCLE20	Ga06G2426	82	9.21	9.52	1—22	Extracellular	GaCLE48	Ga05G1672	81	9.72	9.19	1—22	Extracellular
GaCLE21	Ga05G1674	84	8.71	9.53	1—23	Extracellular	GaCLE49	Ga08G2280	89	9.99	9.52	NO	Nuclear
GaCLE22	Ga10G2758	82	8.71	9.07	1—19	Extracellular	GaCLE50	Ga03G1359	85	9.77	9.61	1—28	Extracellular
GaCLE23	Ga05G3822	117	8.85	12.93	1—23	Extracellular	GaCLE51	Ga08G1194	78	10.02	8.69	NO	Extracellular
GaCLE24	Ga01G0597	128	8.74	14.24	1—23	Extracellular	GaCLE52	Ga01G0598	85	8.93	14.16	1—22	Extracellular
GaCLE25	Ga01G0599	125	6.7	13.98	1—22	Extracellular	GaCLE53	Ga05G1671	81	9.86	8.84	1—21	Extracellular
GaCLE26	Ga08G0309	120	9.16	12.97	1—22	Extracellular	GaCLE54	Ga03G1393	81	10.63	9.32	1—22	Extracellular
GaCLE27	Ga08G0310	117	9.72	12.95	1—22	Extracellular	GaCLE55	Ga12G1063	96	9.89	10.32	1—28	Extracellular
GaCLE28	Ga01G0596	87	6.9	9.71	1—29	Extracellular	GaCLE56	Ga03G1934	78	11.57	8.63	1—26	Nuclear

## Sheet: Table3
Table 3. Characteristics of CLE genes from G. hirsutum. SP: position of Signal peptide sequence; AA: Amino acid; pI: The theoretical isoelectric point of proteins; Mw: The theoretical molecular weight of proteins
Gene name	Gene ID	AA	pI	Mw	SP	Subcellular localization	Gene name	Gene ID	AA	pI	Mw	SP	Subcellular localization
GhCLE1	GH_A05G0974.1	82	10.53	9.22	1—23	Extracellular	GhCLE24.1	GH_D01G0521.1	127	8.02	14.07	1—22	Periplasmic
GhCLE2	GH_A07G1703.1	123	9.89	13.86	NO	Periplasmic	GhCLE24.2	GH_A01G0538.1	128	8.74	14.24	1—23	Extracellular
GhCLE3	GH_A11G1427.1	89	9.69	9.49	NO	Extracellular	GhCLE25.1	GH_D01G0500.1	132	6.97	14.65	1—22	Extracellular
GhCLE4.1	GH_D10G1555.1	93	6.24	9.9	NO	Extracellular	GhCLE25.2	GH_D01G0536.1	125	7.06	14.03	1—22	Extracellular
GhCLE4.2	GH_A10G1331.1	94	6.81	9.95	1—38	Extracellular	GhCLE25.3	GH_A01G0542.1	125	6.7	14.02	1—22	Extracellular
GhCLE5.1	GH_D09G2138.1	117	8.8	12.01	1—36	Nuclear	GhCLE26.1	GH_D08G0278.1	120	9.52	13.06	1—22	Periplasmic
GhCLE5.2	GH_A09G2204.1	115	9.3	11.81	1—36	Nuclear	GhCLE26.2	GH_A08G0262.1	118	9.16	12.81	1—23	Periplasmic
GhCLE6.1	GH_D11G2997.1	74	5.26	8.27	1—26	Cytoplasmic	GhCLE27.1	GH_D08G0279.1	117	10.09	13.04	1—22	Periplasmic
GhCLE6.2	GH_A11G2965.1	74	5.24	8.19	1—26	Cytoplasmic	GhCLE27.2	GH_A08G0263.1	117	9.72	12.98	1—22	Extracellular
GhCLE7.1	GH_D02G1846.1	90	9.35	10.31	1—33	Cytoplasmic	GhCLE28.1	GH_A01G0537.1	87	6.9	9.71	1—29	Extracellular
GhCLE7.2	GH_A03G1683.1	90	9.25	10.46	1—33	Extracellular	GhCLE28.2	GH_D01G0519.1	87	6.9	9.71	1—29	Cytoplasmic
GhCLE8.1	GH_D09G1119.1	86	7.8	9.41	1—22	Extracellular	GhCLE29.1	GH_A09G0026.1	106	9.82	12.1	NO	Extracellular
GhCLE8.2	GH_A09G1160.1	86	7.8	9.39	1—22	Extracellular	GhCLE29.2	GH_D09G0025.1	107	9.82	12.18	NO	Extracellular
GhCLE9.1	GH_D02G1566.1	109	6.34	12.04	NO	Extracellular	GhCLE30.1	GH_A06G0222.1	80	10.15	8.9	1—21	Extracellular
GhCLE9.2	GH_A03G1416.1	141	9.42	15.87	NO	Nuclear	GhCLE30.2	GH_D06G0206.1	80	10.51	8.95	1—23	Extracellular
GhCLE10.1	GH_D11G0068.1	108	9.42	12.42	1—31	Cytoplasmic	GhCLE31	GH_A05G2078.1	90	9.9	10.46	NO	Extracellular
GhCLE10.2	GH_A11G0063.1	108	9.73	12.43	1—32	Cytoplasmic	GhCLE32.1	GH_D05G3134.1	153	10.16	17.23	1—27	Cytoplasmic
GhCLE11.1	GH_D07G0449.1	99	9.3	11.57	1—33	Cytoplasmic	GhCLE32.2	GH_A05G3133.1	96	10.55	10.85	1—27	Extracellular
GhCLE11.2	GH_A07G0447.1	149	9.63	17.45	1—34	Extracellular	GhCLE33.1	GH_D12G1842.1	84	11.45	9.57	1—27	Periplasmic
GhCLE12.1	GH_D02G1405.1	98	9.49	11.14	1—35	Periplasmic	GhCLE33.2	GH_A12G1846.1	84	11.45	9.58	1—27	Periplasmic
GhCLE12.2	GH_A03G1216.1	98	9.1	11.17	1—36	Periplasmic	GhCLE34.1	GH_D04G2115.1	91	11.18	10.43	1—25	Cytoplasmic
GhCLE13.1	GH_D08G0842.1	109	9.3	12.28	1—37	Cytoplasmic	GhCLE34.2	GH_A04G1768.1	91	11.23	10.32	1—25	Extracellular
GhCLE13.2	GH_A08G0838.1	109	9.62	12.31	1—38	Cytoplasmic	GhCLE35.1	GH_D01G1590.1	109	9.89	11.75	NO	Periplasmic
GhCLE14.1	GH_D08G0564.1	76	11.5	8.76	1—39	Extracellular	GhCLE35.2	GH_A01G1502.1	109	9.89	11.88	NO	Nuclear
GhCLE14.2	GH_A08G0564.1	76	11.5	8.79	1—40	Extracellular	GhCLE36	GH_A03G0252.1	85	8.74	9.68	1—16	Extracellular
GhCLE15.1	GH_D11G1642.1	79	11.71	8.88	1—41	Periplasmic	GhCLE37	GH_D09G0021.1	82	8.98	9.41	1—28	Cytoplasmic
GhCLE15.2	GH_A11G1609.1	79	11.48	8.88	1—42	Periplasmic	GhCLE38	GH_A07G2451.1	106	11.24	12.02	NO	Mitochondrial
GhCLE16.1	GH_D07G0936.1	73	11.89	8.31	1—43	Extracellular	GhCLE39	GH_A08G2215.1	161	9	17.63	NO	PlasmaMembrane
GhCLE16.2	GH_A07G0933.1	105	10.29	12.1	1—44	Nuclear	GhCLE40	GH_D08G2225.1	161	9	17.63	NO	Periplasmic
GhCLE17.1	GH_D08G1161.1	83	10.11	9.21	1—45	Extracellular	GhCLE41	GH_A12G2785.1	91	11.6	10.45	1—26	Extracellular
GhCLE17.2	GH_A08G1210.1	83	10.11	9.2	1—46	Extracellular	GhCLE42	GH_D01G0520.1	128	8.93	14.19	1—23	Periplasmic
GhCLE18.1	GH_D09G1905.1	79	9.65	8.75	1—47	Extracellular	GhCLE43	GH_A01G0539.1	128	8.93	14.16	1—22	Extracellular
GhCLE18.2	GH_A09G1955.1	79	9.65	8.72	1—48	Periplasmic	GhCLE44	GH_A05G1574.1	81	9.86	8.84	1—21	Extracellular
GhCLE19.1	GH_D08G2075.1	85	9.36	9.84	1—49	Periplasmic	GhCLE45	GH_D05G1604.1	81	9.77	8.77	1—21	Periplasmic
GhCLE19.2	GH_A08G2062.1	85	9.36	9.84	1—50	Periplasmic	GhCLE46	GH_A03G1184.1	81	10.63	9.35	1—22	Extracellular
GhCLE20.1	GH_D06G2321.1	82	7.91	9.49	1—51	Cytoplasmic	GhCLE47	GH_D02G1373.1	89	10.42	10.19	1—22	Extracellular
GhCLE20.2	GH_A06G2282.1	82	9.21	9.52	1—52	Extracellular	GhCLE48	GH_D12G1958.1	96	9.89	10.44	NO	Periplasmic
GhCLE21.1	GH_D05G1605.1	84	7.81	9.58	1—53	Periplasmic	GhCLE49	GH_A11G0336.1	90	10.06	9.62	NO	Extracellular
GhCLE21.2	GH_A05G1575.1	84	8.71	9.53	1—54	Extracellular	GhCLE50	GH_D11G0351.1	93	10.06	9.86	1—32	Extracellular
GhCLE22.1	GH_D10G0337.1	82	8.71	9.1	1—55	Periplasmic	GhCLE51	GH_D11G3472.1	218	10.22	23.24	1—19	Nuclear
GhCLE22.2	GH_A10G0324.1	82	7.81	9.13	1—56	Periplasmic	GhCLE52	GH_A11G3464.1	230	9.74	24.93	1—23	Nuclear
GhCLE23.1	GH_D05G3656.1	117	9.3	13.13	1—57	Periplasmic	GhCLE53	GH_A11G3462.1	187	10.19	20.03	NO	Nuclear
GhCLE23.2	GH_A04G0408.1	117	8.85	12.92	1—58	Extracellular	GhCLE54	GH_D11G3471.1	218	10.78	23.09	NO	Nuclear

## Sheet: Table4
Table 4. Duplicated CLE gene pairs among three cotton species
Collinear CLE gene pairs in G.arboreum				Collinear CLE gene pairs in G.raimondii						Collinear CLE gene pairs in G.hirsutum					Collinear CLE gene pairs in G.arboreum and G.hirsutum					Collinear CLE gene pairs in G.raimondii and G.hirsutum
Duplicated Gene 2		Duplicated Gene 1			Duplicated Gene 2		Duplicated Gene 1			Duplicated Gene 2		Duplicated Gene 1			Duplicated Gene 2		Duplicated Gene 1			Duplicated Gene 2		Duplicated Gene 1
Gene ID 1	Gene name 1	Gene ID 2	Gene name 2		Gene ID 1	Gene name 1	Gene ID 2	Gene name 2		Gene ID 1	Gene name 1	Gene ID 2	Gene name 2		Gene ID 1	Gene name 1	Gene ID 2	Gene name 2		Gene ID 1	Gene name 1	Gene ID 2	Gene name 2
Ga07G1763.1	GaCLE2	Ga08G2280.1	GaCLE49		Gorai.001G186300.1	GrCLE2	Gorai.007G153500.1	GrCLE3		GH_A07G1703.1	GHCLE2	GH_A11G1427.1	GHCLE3		Ga11G4059.1	GaCLE10	GH_D11G0068.1	GHCLE10.1		GH_A11G0063.1	GHCLE10.2	Gorai.007G007600.1	GrCLE10
Ga07G1763.1	GaCLE2	Ga11G2600.1	GaCLE3		Gorai.005G144400.1	GrCLE12	Gorai.013G091800.1	GrCLE50		GH_A11G1427.1	GHCLE3	GH_D08G2225.1	GHCLE40		Ga11G4059.1	GaCLE10	GH_A11G0063.1	GHCLE10.2		GH_A07G0447.1	GHCLE11.2	Gorai.001G045900.1	GrCLE11
Ga03G1613.1	GaCLE9	Ga12G1339.1	GaCLE43		Gorai.001G095900.1	GrCLE16	Gorai.004G062300.1	GrCLE14		GH_A10G1331.1	GHCLE4.2	GH_D10G1555.1	GHCLE4.1		Ga07G0473.1	GaCLE11	GH_D07G0449.1	GHCLE11.1		GH_A03G1216.1	GHCLE12.2	Gorai.005G144400.1	GrCLE12
Ga08G0592.1	GaCLE14	Ga11G2395.1	GaCLE15		Gorai.004G119100.1	GrCLE17	Gorai.008G278200.1	GrCLE51		GH_A09G2204.1	GHCLE5.2	GH_D09G2138.1	GHCLE5.1		Ga07G0473.1	GaCLE11	GH_A07G0447.1	GHCLE11.2		GH_A08G0838.1	GHCLE13.2	Gorai.004G092000.1	GrCLE13
Ga08G2119.1	GaCLE19	Ga11G3909.1	GaCLE46		Gorai.004G209500.1	GrCLE19	Gorai.007G022900.1	GrCLE47		GH_A11G2965.1	GHCLE6.2	GH_D11G2997.1	GHCLE6.1		Ga03G1427.1	GaCLE12	GH_D02G1405.1	GHCLE12.1		GH_A08G0564.1	GHCLE14.2	Gorai.004G062300.1	GrCLE14
Ga06G2426.1	GaCLE20	Ga10G2758.1	GaCLE22		Gorai.010G242300.1	GrCLE20	Gorai.011G033200.1	GrCLE22		GH_A03G1683.1	GHCLE7.2	GH_D02G1846.1	GHCLE7.1		Ga03G1427.1	GaCLE12	GH_A03G1216.1	GHCLE12.2		GH_A11G1609.1	GHCLE15.2	Gorai.007G171200.1	GrCLE15
Ga05G3337.1	GaCLE32	Ga12G1185.1	GaCLE33		Gorai.009G216600.1	GrCLE31	Gorai.010G023900.1	GrCLE30		GH_A09G1160.1	GHCLE8.2	GH_D09G1119.1	GHCLE8.1		Ga08G0907.1	GaCLE13	GH_D08G0842.1	GHCLE13.1		GH_A11G1609.1	GHCLE15.2	Gorai.001G215800.1	GrCLE45
Ga05G3337.1	GaCLE32	Ga14G1701.1	GaCLE34		Gorai.008G181100.1	GrCLE33	Gorai.012G187200.1	GrCLE34		GH_A03G1416.1	GHCLE9.2	GH_D02G1566.1	GHCLE9.1		Ga08G0907.1	GaCLE13	GH_A08G0838.1	GHCLE13.2		GH_A07G0933.1	GHCLE16.2	Gorai.001G095900.1	GrCLE16
Ga12G1185.1	GaCLE33	Ga14G1701.1	GaCLE34		Gorai.003G160300.1	GrCLE36	Gorai.004G209500.1	GrCLE19		GH_A11G0063.1	GHCLE10.2	GH_D11G0068.1	GHCLE10.1		Ga08G0592.1	GaCLE14	GH_D08G0564.1	GHCLE14.1		GH_A09G1955.1	GHCLE18.2	Gorai.006G197600.1	GrCLE18
Ga01G2549.1	GaCLE36	Ga08G2119.1	GaCLE19		Gorai.003G160300.1	GrCLE36	Gorai.008G278200.1	GrCLE51		GH_A07G0447.1	GHCLE11.2	GH_D07G0449.1	GHCLE11.1		Ga08G0592.1	GaCLE14	GH_A08G0564.1	GHCLE14.2		GH_A08G2062.1	GHCLE19.2	Gorai.004G209500.1	GrCLE19
Ga07G2139.1	GaCLE45	Ga08G0592.1	GaCLE14		Gorai.001G215800.1	GrCLE45	Gorai.007G171200.1	GrCLE15		GH_A03G1216.1	GHCLE12.2	GH_D02G1405.1	GHCLE12.1		Ga11G2395.1	GaCLE15	GH_D11G1642.1	GHCLE15.1		GH_A07G1703.1	GHCLE2	Gorai.001G186300.1	GrCLE2
Ga07G2139.1	GaCLE45	Ga11G2395.1	GaCLE15		Gorai.009G164400.1	GrCLE48	Gorai.011G033200.1	GrCLE22		GH_A08G0838.1	GHCLE13.2	GH_D08G0842.1	GHCLE13.1		Ga11G2395.1	GaCLE15	GH_A11G1609.1	GHCLE15.2		GH_A06G2282.1	GHCLE20.2	Gorai.010G242300.1	GrCLE20
Ga05G1672.1	GaCLE48	Ga06G2426.1	GaCLE20		Gorai.004G225300.1	GrCLE49	Gorai.007G153500.1	GrCLE3		GH_A08G0564.1	GHCLE14.2	GH_D08G0564.1	GHCLE14.1		Ga08G1195.1	GaCLE17	GH_D08G1161.1	GHCLE17.1		GH_A05G1575.1	GHCLE21.2	Gorai.009G164400.1	GrCLE48
Ga05G1672.1	GaCLE48	Ga10G2758.1	GaCLE22		Gorai.002G063700.1	GrCLE52	Gorai.009G372900.1	GrCLE23		GH_A11G1609.1	GHCLE15.2	GH_D11G1642.1	GHCLE15.1		Ga09G2022.1	GaCLE18	GH_D09G1905.1	GHCLE18.1		GH_A10G0324.1	GHCLE22.2	Gorai.011G033200.1	GrCLE22
Ga08G2280.1	GaCLE49	Ga11G2600.1	GaCLE3		Gorai.005G141500.1	GrCLE53	Gorai.008G181100.1	GrCLE33		GH_A07G0933.1	GHCLE16.2	GH_D07G0936.1	GHCLE16.1		Ga09G2022.1	GaCLE18	GH_A09G1955.1	GHCLE18.2		GH_A04G0408.1	GHCLE23.2	Gorai.009G372900.1	GrCLE23
Ga03G1359.1	GaCLE50	Ga13G0839.1	GaCLE44		Gorai.005G141500.1	GrCLE53	Gorai.009G324600.1	GrCLE32		GH_A09G1955.1	GHCLE18.2	GH_D09G1905.1	GHCLE18.1		Ga08G2119.1	GaCLE19	GH_D08G2075.1	GHCLE19.1		GH_A01G0538.1	GHCLE24.2	Gorai.002G063700.1	GrCLE52
Ga08G1194.1	GaCLE51	Ga09G2022.1	GaCLE18							GH_A08G2062.1	GHCLE19.2	GH_D08G2075.1	GHCLE19.1		Ga08G2119.1	GaCLE19	GH_A08G2062.1	GHCLE19.2		GH_A01G0542.1	GHCLE25.3	Gorai.002G064000.1	GrCLE25
Ga03G1393.1	GaCLE54	Ga05G3337.1	GaCLE32							GH_A06G2282.1	GHCLE20.2	GH_D06G2321.1	GHCLE20.1		Ga07G1763.1	GaCLE2	GH_A07G1703.1	GHCLE2		GH_A08G0262.1	GHCLE26.2	Gorai.004G030000.1	GrCLE26
Ga03G1393.1	GaCLE54	Ga12G1185.1	GaCLE33							GH_D05G1605.1	GHCLE21.1	GH_D10G0337.1	GHCLE22.1		Ga06G2426.1	GaCLE20	GH_D06G2321.1	GHCLE20.1		GH_A01G0537.1	GHCLE28.1	Gorai.002G063600.1	GrCLE28
Ga03G1393.1	GaCLE54	Ga12G1063.1	GaCLE55							GH_A05G1575.1	GHCLE21.2	GH_A10G0324.1	GHCLE22.2		Ga06G2426.1	GaCLE20	GH_A06G2282.1	GHCLE20.2		GH_A09G0026.1	GHCLE29.1	Gorai.006G002700.1	GrCLE29
Ga12G1063.1	GaCLE55	Ga12G1185.1	GaCLE33							GH_A05G1575.1	GHCLE21.2	GH_D05G1605.1	GHCLE21.1		Ga10G2758.1	GaCLE22	GH_D05G1605.1	GHCLE21.1		GH_A11G1427.1	GHCLE3	Gorai.007G153500.1	GrCLE3
										GH_A05G1575.1	GHCLE21.2	GH_D10G0337.1	GHCLE22.1		Ga10G2758.1	GaCLE22	GH_D10G0337.1	GHCLE22.1		GH_A06G0222.1	GHCLE30.1	Gorai.009G216600.1	GrCLE31
										GH_A10G0324.1	GHCLE22.2	GH_D05G1605.1	GHCLE21.1		Ga10G2758.1	GaCLE22	GH_A05G1575.1	GHCLE21.2		GH_A06G0222.1	GHCLE30.1	Gorai.010G023900.1	GrCLE30
										GH_A10G0324.1	GHCLE22.2	GH_D10G0337.1	GHCLE22.1		Ga10G2758.1	GaCLE22	GH_A10G0324.1	GHCLE22.2		GH_A05G2078.1	GHCLE31	Gorai.009G216600.1	GrCLE31
										GH_A04G0408.1	GHCLE23.2	GH_D01G0521.1	GHCLE24.1		Ga01G0597.1	GaCLE24	GH_D01G0520.1	GHCLE42		GH_A05G2078.1	GHCLE31	Gorai.010G023900.1	GrCLE30
										GH_A04G0408.1	GHCLE23.2	GH_D05G3656.1	GHCLE23.1		Ga01G0597.1	GaCLE24	GH_A01G0538.1	GHCLE24.2		GH_A05G3133.1	GHCLE32.2	Gorai.009G324600.1	GrCLE32
										GH_A01G0538.1	GHCLE24.2	GH_D01G0520.1	GHCLE42		Ga01G0599.1	GaCLE25	GH_A01G0542.1	GHCLE25.3		GH_A12G1846.1	GHCLE33.2	Gorai.008G181100.1	GrCLE33
										GH_A08G0262.1	GHCLE26.2	GH_D08G0278.1	GHCLE26.1		Ga08G0309.1	GaCLE26	GH_D08G0278.1	GHCLE26.1		GH_A04G1768.1	GHCLE34.2	Gorai.012G187200.1	GrCLE34
										GH_A01G0537.1	GHCLE28.1	GH_D01G0519.1	GHCLE28.2		Ga08G0309.1	GaCLE26	GH_A08G0262.1	GHCLE26.2		GH_A03G0252.1	GHCLE36	Gorai.003G160300.1	GrCLE36
										GH_A06G0222.1	GHCLE30.1	GH_D06G0206.1	GHCLE30.2		Ga01G0596.1	GaCLE28	GH_D01G0519.1	GHCLE28.2		GH_A07G2451.1	GHCLE38	Gorai.001G257800.1	GrCLE38
										GH_A05G2078.1	GHCLE31	GH_A06G0222.1	GHCLE30.1		Ga01G0596.1	GaCLE28	GH_A01G0537.1	GHCLE28.1		GH_A08G2215.1	GHCLE39	Gorai.004G225300.1	GrCLE49
										GH_A05G2078.1	GHCLE31	GH_D06G0206.1	GHCLE30.2		Ga11G2600.1	GaCLE3	GH_D08G2225.1	GHCLE40		GH_A10G1331.1	GHCLE4.2	Gorai.011G159800.1	GrCLE4
										GH_A05G3133.1	GHCLE32.2	GH_D05G3134.1	GHCLE32.1		Ga11G2600.1	GaCLE3	GH_A07G1703.1	GHCLE2		GH_A12G2785.1	GHCLE41	Gorai.008G278200.1	GrCLE51
										GH_A12G1846.1	GHCLE33.2	GH_D12G1842.1	GHCLE33.1		Ga11G2600.1	GaCLE3	GH_A11G1427.1	GHCLE3		GH_A03G1184.1	GHCLE46	Gorai.005G141500.1	GrCLE53
										GH_A04G1768.1	GHCLE34.2	GH_D04G2115.1	GHCLE34.1		Ga11G2600.1	GaCLE3	GH_A08G2215.1	GHCLE39		GH_A09G2204.1	GHCLE5.2	Gorai.006G221500.1	GrCLE5
										GH_A03G0252.1	GHCLE36	GH_A08G2062.1	GHCLE19.2		Ga06G0234.1	GaCLE30	GH_D06G0206.1	GHCLE30.2		GH_A11G2965.1	GHCLE6.2	Gorai.007G296300.1	GrCLE6
										GH_A03G0252.1	GHCLE36	GH_D08G2075.1	GHCLE19.1		Ga06G0234.1	GaCLE30	GH_A06G0222.1	GHCLE30.1		GH_A03G1683.1	GHCLE7.2	Gorai.005G190400.1	GrCLE7
										GH_A08G2215.1	GHCLE39	GH_A11G1427.1	GHCLE3		Ga06G0234.1	GaCLE30	GH_A05G2078.1	GHCLE31		GH_A09G1160.1	GHCLE8.2	Gorai.006G114900.1	GrCLE8
										GH_A08G2215.1	GHCLE39	GH_D08G2225.1	GHCLE40		Ga05G3337.1	GaCLE32	GH_D05G3134.1	GHCLE32.1
										GH_D01G0520.1	GHCLE42	GH_D05G3656.1	GHCLE23.1		Ga05G3337.1	GaCLE32	GH_A05G3133.1	GHCLE32.2
										GH_A05G1574.1	GHCLE44	GH_D05G1604.1	GHCLE45		Ga12G1185.1	GaCLE33	GH_D12G1842.1	GHCLE33.1
										GH_A03G1184.1	GHCLE46	GH_D02G1373.1	GHCLE47		Ga12G1185.1	GaCLE33	GH_A12G1846.1	GHCLE33.2
										GH_A11G0336.1	GHCLE49	GH_D11G0351.1	GHCLE50		Ga14G1701.1	GaCLE34	GH_D04G2115.1	GHCLE34.1
										GH_A11G0336.1	GHCLE49	GH_D12G1958.1	GHCLE48		Ga14G1701.1	GaCLE34	GH_A04G1768.1	GHCLE34.2
										GH_D11G0351.1	GHCLE50	GH_D12G1958.1	GHCLE48		Ga01G2549.1	GaCLE36	GH_A03G0252.1	GHCLE36
										GH_A11G3462.1	GHCLE53	GH_D11G3471.1	GHCLE54		Ga09G0024.1	GaCLE37	GH_D09G0021.1	GHCLE37
															Ga07G2513.1	GaCLE38	GH_A07G2451.1	GHCLE38
															Ga10G1467.1	GaCLE4	GH_D10G1555.1	GHCLE4.1
															Ga10G1467.1	GaCLE4	GH_A10G1331.1	GHCLE4.2
															Ga12G1339.1	GaCLE43	GH_D02G1566.1	GHCLE9.1
															Ga07G2139.1	GaCLE45	GH_D11G1642.1	GHCLE15.1
															Ga07G2139.1	GaCLE45	GH_A11G1609.1	GHCLE15.2
															Ga05G1672.1	GaCLE48	GH_D05G1605.1	GHCLE21.1
															Ga05G1672.1	GaCLE48	GH_A05G1575.1	GHCLE21.2
															Ga05G1672.1	GaCLE48	GH_A10G0324.1	GHCLE22.2
															Ga08G2280.1	GaCLE49	GH_D08G2225.1	GHCLE40
															Ga08G2280.1	GaCLE49	GH_A11G1427.1	GHCLE3
															Ga08G2280.1	GaCLE49	GH_A08G2215.1	GHCLE39
															Ga09G2281.1	GaCLE5	GH_D09G2138.1	GHCLE5.1
															Ga09G2281.1	GaCLE5	GH_A09G2204.1	GHCLE5.2
															Ga05G1671.1	GaCLE53	GH_D05G1604.1	GHCLE45
															Ga05G1671.1	GaCLE53	GH_A05G1574.1	GHCLE44
															Ga03G1393.1	GaCLE54	GH_D02G1373.1	GHCLE47
															Ga03G1393.1	GaCLE54	GH_A03G1184.1	GHCLE46
															Ga12G1063.1	GaCLE55	GH_D12G1958.1	GHCLE48
															Ga11G0902.1	GaCLE6	GH_D11G2997.1	GHCLE6.1
															Ga11G0902.1	GaCLE6	GH_A11G2965.1	GHCLE6.2
															Ga03G1952.1	GaCLE7	GH_D02G1846.1	GHCLE7.1
															Ga03G1952.1	GaCLE7	GH_A03G1683.1	GHCLE7.2
															Ga09G1158.1	GaCLE8	GH_D09G1119.1	GHCLE8.1
															Ga09G1158.1	GaCLE8	GH_A09G1160.1	GHCLE8.2
															Ga03G1613.1	GaCLE9	GH_D02G1566.1	GHCLE9.1
															Ga03G1613.1	GaCLE9	GH_A03G1416.1	GHCLE9.2

## Sheet: Table5
Table 5. The Ks/Ka values and segmental duplication for CLE gene pairs in G. hirsutum.
Duplicated Gene 2		Duplicated Gene 1
Gene name 1	Gene ID 1	Gene name 2	Gene ID 2	Ka	Ks	Ka/Ks	Slection type	Duplication Type
GhCLE2	GH_A07G1703.1	GhCLE3	GH_A11G1427.1	0.269347	0.670138	0.401929	Purifying sele	WGD or Segmental
GhCLE3	GH_A11G1427.1	GhCLE40	GH_D08G2225.1	0.331375	0.629218	0.526645	Purifying sele	WGD or Segmental
GhCLE4.2	GH_A10G1331.1	GhCLE4.1	GH_D10G1555.1	0.0296457	0.072258	0.410275	Purifying sele	WGD or Segmental
GhCLE5.2	GH_A09G2204.1	GhCLE5.1	GH_D09G2138.1	0.0160595	0.103315	0.155442	Purifying sele	WGD or Segmental
GhCLE7.2	GH_A03G1683.1	GhCLE7.1	GH_D02G1846.1	0.0289891	0.0191093	1.51701	directional sele	WGD or Segmental
GhCLE8.2	GH_A09G1160.1	GhCLE8.1	GH_D09G1119.1	0.00493017	0.0185768	0.265394	Purifying sele	WGD or Segmental
GhCLE9.2	GH_A03G1416.1	GhCLE9.1	GH_D02G1566.1	0.00786892	0.0431774	0.182246	Purifying sele	WGD or Segmental
GhCLE10.2	GH_A11G0063.1	GhCLE10.1	GH_D11G0068.1	0.00408164	0.0667106	0.0611843	Purifying sele	WGD or Segmental
GhCLE11.2	GH_A07G0447.1	GhCLE11.1	GH_D07G0449.1	0.00870206	0.0470128	0.1851	Purifying sele	WGD or Segmental
GhCLE12.2	GH_A03G1216.1	GhCLE12.1	GH_D02G1405.1	0.0138893	0.0405504	0.342519	Purifying sele	WGD or Segmental
GhCLE13.2	GH_A08G0838.1	GhCLE13.1	GH_D08G0842.1	0.00524937	0.0166212	0.315824	Purifying sele	WGD or Segmental
GhCLE19.2	GH_A08G2062.1	GhCLE19.1	GH_D08G2075.1	0.00508046	0.0175961	0.288726	Purifying sele	WGD or Segmental
GhCLE20.2	GH_A06G2282.1	GhCLE20.1	GH_D06G2321.1	0.02703	0.0539154	0.50134	Purifying sele	WGD or Segmental
GhCLE21.1	GH_D05G1605.1	GhCLE22.1	GH_D10G0337.1	0.14163	0.749099	0.189067	Purifying sele	WGD or Segmental
GhCLE21.2	GH_A05G1575.1	GhCLE22.2	GH_A10G0324.1	0.142587	0.883201	0.161444	Purifying sele	WGD or Segmental
GhCLE21.2	GH_A05G1575.1	GhCLE21.1	GH_D05G1605.1	0.0212028	0.0166674	1.27212	directional sele	WGD or Segmental
GhCLE21.2	GH_A05G1575.1	GhCLE22.1	GH_D10G0337.1	0.143526	0.826078	0.173744	Purifying sele	WGD or Segmental
GhCLE22.2	GH_A10G0324.1	GhCLE21.1	GH_D05G1605.1	0.140694	0.800977	0.175653	Purifying sele	WGD or Segmental
GhCLE22.2	GH_A10G0324.1	GhCLE22.1	GH_D10G0337.1	0.0161877	0.0172421	0.938844	Purifying sele	WGD or Segmental
GhCLE23.2	GH_A04G0408.1	GhCLE24.1	GH_D01G0521.1	0.350116	1.01104	0.346293	Purifying sele	WGD or Segmental
GhCLE23.2	GH_A04G0408.1	GhCLE23.1	GH_D05G3656.1	0.0469945	0.0771947	0.608779	Purifying sele	WGD or Segmental
GhCLE24.2	GH_A01G0538.1	GhCLE42	GH_D01G0520.1	0.0169643	0.0480645	0.352948	Purifying sele	WGD or Segmental
GhCLE24.2	GH_A01G0538.1	GhCLE26.1	GH_D08G0278.1	0.497579	0.988094	0.503574	Purifying sele	WGD or Segmental
GhCLE30.1	GH_A06G0222.1	GhCLE30.2	GH_D06G0206.1	0.0109142	0.0182657	0.597525	Purifying sele	WGD or Segmental
GhCLE31	GH_A05G2078.1	GhCLE30.1	GH_A06G0222.1	0.364777	0.485854	0.750796	Purifying sele	WGD or Segmental
GhCLE31	GH_A05G2078.1	GhCLE30.2	GH_D06G0206.1	0.362287	0.532324	0.680576	Purifying sele	WGD or Segmental
GhCLE32.2	GH_A05G3133.1	GhCLE32.1	GH_D05G3134.1	0.0318471	0.0657956	0.484031	Purifying sele	WGD or Segmental
GhCLE33.2	GH_A12G1846.1	GhCLE33.1	GH_D12G1842.1	0.0103629	0.0355096	0.291833	Purifying sele	WGD or Segmental
GhCLE34.2	GH_A04G1768.1	GhCLE34.1	GH_D04G2115.1	0.014196	0.0169499	0.837529	Purifying sele	WGD or Segmental
GhCLE36	GH_A03G0252.1	GhCLE19.2	GH_A08G2062.1	0.258131	0.6238	0.413805	Purifying sele	WGD or Segmental
GhCLE36	GH_A03G0252.1	GhCLE19.1	GH_D08G2075.1	0.249268	0.584773	0.426264	Purifying sele	WGD or Segmental
GhCLE39	GH_A08G2215.1	GhCLE3	GH_A11G1427.1	0.440101	1.11288	0.395462	Purifying sele	WGD or Segmental
GhCLE42	GH_D01G0520.1	GhCLE23.1	GH_D05G3656.1	0.301116	0.818948	0.367687	Purifying sele	WGD or Segmental
GhCLE44	GH_A05G1574.1	GhCLE45	GH_D05G1604.1	0.0163346	0.0176479	0.925584	Purifying sele	WGD or Segmental
GhCLE46	GH_A03G1184.1	GhCLE47	GH_D02G1373.1	0.0106149	0.0791508	0.13411	Purifying sele	WGD or Segmental
GhCLE49	GH_A11G0336.1	GhCLE50	GH_D11G0351.1	0.00987669	0.0467684	0.211183	Purifying sele	WGD or Segmental
GhCLE49	GH_A11G0336.1	GhCLE48	GH_D12G1958.1	0.324144	1.11059	0.291866	Purifying sele	WGD or Segmental
GhCLE50	GH_D11G0351.1	GhCLE48	GH_D12G1958.1	0.323704	1.03145	0.313834	Purifying sele	WGD or Segmental
GhCLE53	GH_A11G3462.1	GhCLE54	GH_D11G3471.1	0.172064	0.360524	0.477262	Purifying sele	WGD or Segmental

## Sheet: Table6
Table 6. The Ks/Ka values and segmental duplication for CLE gene pairs between G.arboreum and G.hirsutum.
Duplicated Gene 2		Duplicated Gene 1
Gene name 1	Gene ID 1	Gene name 2	Gene ID 2	Ka	Ks	Ka/Ks	Slection type	Duplication Type
GhCLE10.1	GH_D11G0068.1	GaCLE10	Ga11G4059.1	0.00408164	0.0667106	0.0611843	Purifying sele	WGD or Segmental
GhCLE11.1	GH_D07G0449.1	GaCLE11	Ga07G0473.1	0.00434469	0.0308527	0.140821	Purifying sele	WGD or Segmental
GhCLE11.2	GH_A07G0447.1	GaCLE11	Ga07G0473.1	0.00430109	0.0151139	0.284579	Purifying sele	WGD or Segmental
GhCLE12.1	GH_D02G1405.1	GaCLE12	Ga03G1427.1	0.00460831	0.0132162	0.348686	Purifying sele	WGD or Segmental
GhCLE12.2	GH_A03G1216.1	GaCLE12	Ga03G1427.1	0.00921671	0.0269087	0.342517	Purifying sele	WGD or Segmental
GhCLE13.1	GH_D08G0842.1	GaCLE13	Ga08G0907.1	0.00524937	0.0166212	0.315824	Purifying sele	WGD or Segmental
GhCLE14.1	GH_D08G0564.1	GaCLE14	Ga08G0592.1	0.014728	0.064556	0.228143	Purifying sele	WGD or Segmental
GhCLE15.1	GH_D11G1642.1	GaCLE45	Ga07G2139.1	0.199951	0.535794	0.373186	Purifying sele	WGD or Segmental
GhCLE15.2	GH_A11G1609.1	GaCLE45	Ga07G2139.1	0.207693	0.535794	0.387636	Purifying sele	WGD or Segmental
GhCLE17.1	GH_D08G1161.1	GaCLE17	Ga08G1195.1	0.027091	0.124361	0.217842	Purifying sele	WGD or Segmental
GhCLE2	GH_A07G1703.1	GaCLE2	Ga07G1763.1	0.00869575	0.0129873	0.669556	Purifying sele	WGD or Segmental
GhCLE2	GH_A07G1703.1	GaCLE3	Ga11G2600.1	0.337603	0.585299	0.576805	Purifying sele	WGD or Segmental
GhCLE20.1	GH_D06G2321.1	GaCLE20	Ga06G2426.1	0.02703	0.0539154	0.50134	Purifying sele	WGD or Segmental
GhCLE21.1	GH_D05G1605.1	GaCLE22	Ga10G2758.1	0.138819	0.809335	0.171522	Purifying sele	WGD or Segmental
GhCLE21.1	GH_D05G1605.1	GaCLE48	Ga05G1672.1	0.560225	1.32312	0.423412	Purifying sele	WGD or Segmental
GhCLE21.2	GH_A05G1575.1	GaCLE48	Ga05G1672.1	0.545794	1.23847	0.440699	Purifying sele	WGD or Segmental
GhCLE21.2	GH_A05G1575.1	GaCLE22	Ga10G2758.1	0.140708	0.891988	0.157746	Purifying sele	WGD or Segmental
GhCLE22.1	GH_D10G0337.1	GaCLE22	Ga10G2758.1	0.0107722	0.0171436	0.62835	Purifying sele	WGD or Segmental
GhCLE22.2	GH_A10G0324.1	GaCLE48	Ga05G1672.1	0.49134	2.80325	0.175275	Purifying sele	WGD or Segmental
GhCLE25.3	GH_A01G0542.1	GaCLE25	Ga01G0599.1	0.00345623	0.011858	0.291469	Purifying sele	WGD or Segmental
GhCLE26.1	GH_D08G0278.1	GaCLE26	Ga08G0309.1	0.0298176	0.0602734	0.494706	Purifying sele	WGD or Segmental
GhCLE26.2	GH_A08G0262.1	GaCLE26	Ga08G0309.1	0.0111942	0.0120003	0.932833	Purifying sele	WGD or Segmental
GhCLE3	GH_A11G1427.1	GaCLE49	Ga08G2280.1	0.440101	1.11288	0.395462	Purifying sele	WGD or Segmental
GhCLE30.2	GH_D06G0206.1	GaCLE30	Ga06G0234.1	0.0109142	0.0182657	0.597525	Purifying sele	WGD or Segmental
GhCLE31	GH_A05G2078.1	GaCLE30	Ga06G0234.1	0.364777	0.485854	0.750796	Purifying sele	WGD or Segmental
GhCLE32.1	GH_D05G3134.1	GaCLE32	Ga05G3337.1	0.0272345	0.0656156	0.415061	Purifying sele	WGD or Segmental
GhCLE33.1	GH_D12G1842.1	GaCLE33	Ga12G1185.1	0.0103629	0.0355096	0.291833	Purifying sele	WGD or Segmental
GhCLE34.1	GH_D04G2115.1	GaCLE34	Ga14G1701.1	0.014196	0.0169499	0.837529	Purifying sele	WGD or Segmental
GhCLE36	GH_A03G0252.1	GaCLE36	Ga01G2549.1	0.00572522	0.0204094	0.280518	Purifying sele	WGD or Segmental
GhCLE37	GH_D09G0021.1	GaCLE37	Ga09G0024.1	0.032292	0.122304	0.26403	Purifying sele	WGD or Segmental
GhCLE39	GH_A08G2215.1	GaCLE3	Ga11G2600.1	0.440101	1.02045	0.431279	Purifying sele	WGD or Segmental
GhCLE4.1	GH_D10G1555.1	GaCLE4	Ga10G1467.1	0.0295969	0.072608	0.407626	Purifying sele	WGD or Segmental
GhCLE45	GH_D05G1604.1	GaCLE53	Ga05G1671.1	0.0163346	0.0176479	0.925584	Purifying sele	WGD or Segmental
GhCLE5.1	GH_D09G2138.1	GaCLE5	Ga09G2281.1	0.0283148	0.0912806	0.310195	Purifying sele	WGD or Segmental
GhCLE5.2	GH_A09G2204.1	GaCLE5	Ga09G2281.1	0.0120163	0.0107916	1.11349	directional sele	WGD or Segmental
GhCLE7.1	GH_D02G1846.1	GaCLE7	Ga03G1952.1	0.019201	0.0191093	1.0048	directional sele	WGD or Segmental
GhCLE8.1	GH_D09G1119.1	GaCLE8	Ga09G1158.1	0.1427	0.242491	0.588474	Purifying sele	WGD or Segmental
GhCLE8.2	GH_A09G1160.1	GaCLE8	Ga09G1158.1	0.136554	0.21974	0.621433	Purifying sele	WGD or Segmental
GhCLE9.1	GH_D02G1566.1	GaCLE9	Ga03G1613.1	0.0118346	0.0431774	0.274092	Purifying sele	WGD or Segmental
GhCLE9.1	GH_D02G1566.1	GaCLE43	Ga12G1339.1	0.248085	0.542167	0.457581	Purifying sele	WGD or Segmental

## Sheet: Table7
Table 7. The Ks/Ka values and segmental duplication for CLE gene pairs between G.raimondii and G.hirsutum.
Duplicated Gene 2		Duplicated Gene 1
Gene name 1	Gene ID 1	Gene name 2	Gene ID 2	Ka	Ks	Ka/Ks	Slection type	Duplication Type
GhCLE10.1	GH_D11G0068.1	GrCLE10	Gorai.007G007600.1	0.00815502	0.0130296	0.625882	Purifying sele	WGD or Segmental
GhCLE10.2	GH_A11G0063.1	GrCLE10	Gorai.007G007600.1	0.0125657	0.0536542	0.234199	Purifying sele	WGD or Segmental
GhCLE11.1	GH_D07G0449.1	GrCLE11	Gorai.001G045900.1	0.00434155	0.0153067	0.283638	Purifying sele	WGD or Segmental
GhCLE11.2	GH_A07G0447.1	GrCLE11	Gorai.001G045900.1	0.0133932	0.0314182	0.426288	Purifying sele	WGD or Segmental
GhCLE12.2	GH_A03G1216.1	GrCLE12	Gorai.005G144400.1	0.00944894	0.0411062	0.229867	Purifying sele	WGD or Segmental
GhCLE13.2	GH_A08G0838.1	GrCLE13	Gorai.004G092000.1	0.00814119	0.027526	0.295763	Purifying sele	WGD or Segmental
GhCLE14.2	GH_A08G0564.1	GrCLE14	Gorai.004G062300.1	0.0121154	0.0368738	0.328563	Purifying sele	WGD or Segmental
GhCLE18.2	GH_A09G1955.1	GrCLE18	Gorai.006G197600.1	0.0175961	0.0172918	1.0176	directional sele	WGD or Segmental
GhCLE19.2	GH_A08G2062.1	GrCLE19	Gorai.004G209500.1	0.0104989	0.0176999	0.593158	Purifying sele	WGD or Segmental
GhCLE2	GH_A07G1703.1	GrCLE2	Gorai.001G186300.1	0.0133932	0.0822742	0.162788	Purifying sele	WGD or Segmental
GhCLE20.1	GH_D06G2321.1	GrCLE20	Gorai.010G242300.1	0.0161152	0.0354048	0.45517	Purifying sele	WGD or Segmental
GhCLE20.2	GH_A06G2282.1	GrCLE20	Gorai.010G242300.1	0.0335251	0.0545695	0.614356	Purifying sele	WGD or Segmental
GhCLE22.1	GH_D10G0337.1	GrCLE22	Gorai.011G033200.1	0.00536195	0.0171927	0.311873	Purifying sele	WGD or Segmental
GhCLE22.2	GH_A10G0324.1	GrCLE22	Gorai.011G033200.1	0.0110908	0.0350941	0.316029	Purifying sele	WGD or Segmental
GhCLE23.2	GH_A04G0408.1	GrCLE23	Gorai.009G372900.1	0.0321455	0.0490881	0.654852	Purifying sele	WGD or Segmental
GhCLE25.3	GH_A01G0542.1	GrCLE25	Gorai.002G064000.1	0.00705888	0.0119524	0.59058	Purifying sele	WGD or Segmental
GhCLE26.1	GH_D08G0278.1	GrCLE26	Gorai.004G030000.1	0.0110533	0.0116394	0.949645	Purifying sele	WGD or Segmental
GhCLE26.2	GH_A08G0262.1	GrCLE26	Gorai.004G030000.1	0.0269865	0.0366299	0.736736	Purifying sele	WGD or Segmental
GhCLE28.2	GH_D01G0519.1	GrCLE28	Gorai.002G063600.1	0.00500419	0.0167138	0.299405	Purifying sele	WGD or Segmental
GhCLE28.1	GH_A01G0537.1	GrCLE28	Gorai.002G063600.1	0.00512385	0.0345883	0.148138	Purifying sele	WGD or Segmental
GhCLE3	GH_A11G1427.1	GrCLE3	Gorai.007G153500.1	0.0205757	0.0319622	0.643749	Purifying sele	WGD or Segmental
GhCLE30.2	GH_D06G0206.1	GrCLE30	Gorai.010G023900.1	0.0109341	0.0181552	0.602259	Purifying sele	WGD or Segmental
GhCLE31	GH_A05G2078.1	GrCLE30	Gorai.010G023900.1	0.375755	0.469921	0.799613	Purifying sele	WGD or Segmental
GhCLE30.2	GH_D06G0206.1	GrCLE31	Gorai.009G216600.1	0.377511	0.716634	0.526784	Purifying sele	WGD or Segmental
GhCLE30.1	GH_A06G0222.1	GrCLE31	Gorai.009G216600.1	0.400651	0.651574	0.614896	Purifying sele	WGD or Segmental
GhCLE31	GH_A05G2078.1	GrCLE31	Gorai.009G216600.1	0.0359889	0.0940565	0.382631	Purifying sele	WGD or Segmental
GhCLE32.1	GH_D05G3134.1	GrCLE32	Gorai.009G324600.1	0.00894865	0.0160006	0.55927	Purifying sele	WGD or Segmental
GhCLE32.2	GH_A05G3133.1	GrCLE32	Gorai.009G324600.1	0.0324877	0.0855628	0.379694	Purifying sele	WGD or Segmental
GhCLE33.2	GH_A12G1846.1	GrCLE33	Gorai.008G181100.1	0.0106009	0.0365926	0.2897	Purifying sele	WGD or Segmental
GhCLE34.1	GH_D04G2115.1	GrCLE34	Gorai.012G187200.1	0.00468751	0.0346883	0.135133	Purifying sele	WGD or Segmental
GhCLE34.2	GH_A04G1768.1	GrCLE34	Gorai.012G187200.1	0.0193872	0.0535942	0.36174	Purifying sele	WGD or Segmental
GhCLE36	GH_A03G0252.1	GrCLE36	Gorai.003G160300.1	0.0118697	0.109284	0.108613	Purifying sele	WGD or Segmental
GhCLE38	GH_A07G2451.1	GrCLE38	Gorai.001G257800.1	0.00836829	0.0284394	0.29425	Purifying sele	WGD or Segmental
GhCLE4.1	GH_D10G1555.1	GrCLE4	Gorai.011G159800.1	0.0296946	0.0138412	2.14537	directional sele	WGD or Segmental
GhCLE4.2	GH_A10G1331.1	GrCLE4	Gorai.011G159800.1	0.0253617	0.0425646	0.595839	Purifying sele	WGD or Segmental
GhCLE9.1	GH_D02G1566.1	GrCLE43	Gorai.008G167000.1	0.227042	0.708048	0.320659	Purifying sele	WGD or Segmental
GhCLE15.1	GH_D11G1642.1	GrCLE45	Gorai.001G215800.1	0.199277	0.471456	0.422685	Purifying sele	WGD or Segmental
GhCLE15.2	GH_A11G1609.1	GrCLE45	Gorai.001G215800.1	0.213003	0.494434	0.430801	Purifying sele	WGD or Segmental
GhCLE21.1	GH_D05G1605.1	GrCLE48	Gorai.009G164400.1	0.54229	1.27324	0.425913	Purifying sele	WGD or Segmental
GhCLE21.2	GH_A05G1575.1	GrCLE48	Gorai.009G164400.1	0.552795	1.22964	0.44956	Purifying sele	WGD or Segmental
GhCLE5.1	GH_D09G2138.1	GrCLE5	Gorai.006G221500.1	0.0117881	0.0324375	0.363409	Purifying sele	WGD or Segmental
GhCLE5.2	GH_A09G2204.1	GrCLE5	Gorai.006G221500.1	0.0204721	0.118238	0.173143	Purifying sele	WGD or Segmental
GhCLE41	GH_A12G2785.1	GrCLE51	Gorai.008G278200.1	0.040312	0.0490638	0.821623	Purifying sele	WGD or Segmental
GhCLE24.2	GH_A01G0538.1	GrCLE52	Gorai.002G063700.1	0.0172769	0.0484528	0.356572	Purifying sele	WGD or Segmental
GhCLE46	GH_A03G1184.1	GrCLE53	Gorai.005G141500.1	0.0163494	0.0606391	0.269619	Purifying sele	WGD or Segmental
GhCLE8.1	GH_D09G1119.1	GrCLE8	Gorai.006G114900.1	0.136804	0.218277	0.626745	Purifying sele	WGD or Segmental
GhCLE8.2	GH_A09G1160.1	GrCLE8	Gorai.006G114900.1	0.146463	0.249268	0.587572	Purifying sele	WGD or Segmental

## Sheet: Table8
Table 8. Annotation summary of proteins involved in the GhCLEs interaction network
Gene	Score	Annotation
CLE5		CLAVATA3/ESR (CLE)-related protein 5; Member of a large family of putative ligands homologous to the Clavata3 gene. Consists of a single exon; Belongs to the CLV3/ESR signal peptide family (81 aa)
CLE4	0.911	CLAVATA3/ESR (CLE)-related protein 4; Member of a large family of putative ligands homologous to the Clavata3 gene. Consists of a single exon; Belongs to the CLV3/ESR signal peptide family
CLE7	0.906	CLAVATA3/ESR (CLE)-related protein 7; Member of a large family of putative ligands homologous to the Clavata3 gene. Consists of a single exon; Belongs to the CLV3/ESR signal peptide family
CLE11	0.771	CLAVATA3/ESR (CLE)-related protein 11; Member of a large family of putative ligands homologous to the Clavata3 gene. Consists of a single exon. Can partially replace CLV3 function in vivo; Belongs to the CLV3/ESR signal peptide family
CLE13	0.731	CLAVATA3/ESR (CLE)-related protein 13; Member of a large family of putative ligands homologous to the Clavata3 gene. Consists of a single exon. Can partially replace CLV3 function in vivo; Belongs to the CLV3/ESR signal peptide family
CLE12	0.715	CLAVATA3/ESR (CLE)-related protein 12; Member of a large family of putative ligands homologous to the Clavata3 gene. Consists of a single exon; Belongs to the CLV3/ESR signal peptide family
CLE3	0.7	CLAVATA3/ESR (CLE)-related protein 3; Member of a large family of putative ligands homologous to the Clavata3 gene. Consists of a single exon; Belongs to the CLV3/ESR signal peptide family
CLE27	0.699	CLAVATA3/ESR (CLE)-related protein 27; Member of a large family of putative ligands homologous to the Clavata3 gene. Consists of a single exon; Belongs to the CLV3/ESR signal peptide family
CLE25	0.696	CLAVATA3/ESR (CLE)-related protein 25; Member of a large family of putative ligands homologous to the Clavata3 gene. Consists of a single exon. Can not replace CLV3 function in vivo; Belongs to the CLV3/ESR signal peptide family
CLE26	0.642	CLAVATA3/ESR (CLE)-related protein 26; Member of a large family of putative ligands homologous to the Clavata3 gene. Consists of a single exon. Can not replace CLV3 function in vivo; Belongs to the CLV3/ESR signal peptide family
CLE2	0.642	CLAVATA3/ESR (CLE)-related protein 2; Extracellular signal peptide that regulates cell fate. May act with CLV1 as a ligand-receptor pair in a signal transduction pathway, coordinating growth between adjacent meristematic regions
CLE6		CLAVATA3/ESR (CLE)-related protein 6; Member of a large family of putative ligands homologous to the Clavata3 gene. Consists of a single exon. Can replace CLV3 function in vivo; Belongs to the CLV3/ESR signal peptide family (81 aa)
CLE4	0.916	CLAVATA3/ESR (CLE)-related protein 4; Member of a large family of putative ligands homologous to the Clavata3 gene. Consists of a single exon; Belongs to the CLV3/ESR signal peptide family
CLE7	0.912	CLAVATA3/ESR (CLE)-related protein 7; Member of a large family of putative ligands homologous to the Clavata3 gene. Consists of a single exon; Belongs to the CLV3/ESR signal peptide family
CLE11	0.791	CLAVATA3/ESR (CLE)-related protein 11; Member of a large family of putative ligands homologous to the Clavata3 gene. Consists of a single exon. Can partially replace CLV3 function in vivo; Belongs to the CLV3/ESR signal peptide family
CLE13	0.740	CLAVATA3/ESR (CLE)-related protein 13; Member of a large family of putative ligands homologous to the Clavata3 gene. Consists of a single exon. Can partially replace CLV3 function in vivo; Belongs to the CLV3/ESR signal peptide family
CLE12	0.739	CLAVATA3/ESR (CLE)-related protein 12; Member of a large family of putative ligands homologous to the Clavata3 gene. Consists of a single exon; Belongs to the CLV3/ESR signal peptide family
CLE3	0.737	CLAVATA3/ESR (CLE)-related protein 3; Member of a large family of putative ligands homologous to the Clavata3 gene. Consists of a single exon; Belongs to the CLV3/ESR signal peptide family
CLE2	0.733	CLAVATA3/ESR (CLE)-related protein 2; Extracellular signal peptide that regulates cell fate. May act with CLV1 as a ligand-receptor pair in a signal transduction pathway, coordinating growth between adjacent meristematic regions
CLE27	0.710	CLAVATA3/ESR (CLE)-related protein 27; Member of a large family of putative ligands homologous to the Clavata3 gene. Consists of a single exon; Belongs to the CLV3/ESR signal peptide family
CLE25	0.699	CLAVATA3/ESR (CLE)-related protein 25; Member of a large family of putative ligands homologous to the Clavata3 gene. Consists of a single exon. Can not replace CLV3 function in vivo; Belongs to the CLV3/ESR signal peptide family
CLE19	0.693	CLAVATA3/ESR (CLE)-related protein 19; Member of a large family of putative ligands homologous to the Clavata3 gene. Consists of a single exon. Can partially replace CLV3 function in vivo. Regulates root meristem size in a SCR and SHR-independent pathway; Belongs to the CLV3/ESR signal peptide family
CLE41		CLAVATA3/ESR (CLE)-related protein 41; Belongs to a large gene family, called CLE for CLAVATA3/ESR-related, encoding small peptides with conserved carboxyl termini. The C-terminal 12 amino acid sequence of CLE41 is identical to that of a dodeca peptide (TDIF, tracheary element differentiation inhibitory factor) isolated from Arabidopsis and functions as a suppressor of plant stem cell differentia…
WOX4	0.968	Encodes a WUSCHEL-related homeobox gene family member with 65 amino acids in its homeodomain. Proteins in this family contain a sequence of eight residues (TLPLFPMH) downstream of the homeodomain called the WUS box. This protein also contains an acidic domain approximately 10 residues upstream of the WUS box. Part of the TDIF-TDR-WOX4 signaling pathway that plays a crucial role in the maintenance…
PXY	0.967	Leucine-rich repeat receptor-like protein kinase TDR; Acts with CLE41p and CLE44p peptides as a ligand- receptor pair in a signal transduction pathway involved in the regulation of procambium maintenance and polarity during vascular- tissue development. Mediates repression of tracheary element differentiation and the promotion of procambial cells formation and polar division adjacent to phloem ce…
CLE42	0.966	CLAVATA3/ESR (CLE)-related protein 42; Extracellular signal peptide that regulates cell fate. Represses tracheary element differentiation but promotes the formation of procambial cells; Belongs to the CLV3/ESR signal peptide family
CLV3	0.908	Protein CLAVATA 3; One of the three CLAVATA genes controlling the size of the shoot apical meristem (SAM) in Arabidopsis. Belongs to a large gene family called CLE for CLAVATA3/ESR-related. Encodes a stem cell-specific protein CLV3 presumed to be a precursor of a secreted peptide hormone. The deduced ORF encodes a 96-amino acid protein with an 18-amino acid N-terminal signal peptide. The function…
CLE40	0.897	CLAVATA3/ESR (CLE)-related protein 40; Extracellular signal peptide secreted by differentiated root cells that regulates root cell fate. Acts with ACR4 as a ligand-receptor pair in a signal transduction pathway, coordinating movement of the root tip and organization of cell divisions in the root meristem. Promotes cell differentiation in the distal root meristem in a dose-dependent manner, especi…
CLE19	0.89	CLAVATA3/ESR (CLE)-related protein 19; Member of a large family of putative ligands homologous to the Clavata3 gene. Consists of a single exon. Can partially replace CLV3 function in vivo. Regulates root meristem size in a SCR and SHR-independent pathway; Belongs to the CLV3/ESR signal peptide family
WOX14	0.864	Encodes a WUSCHEL-related homeobox gene family member with 65 amino acids in its homeodomain. Proteins in this family contain a sequence of eight residues (TLPLFPMH) downstream of the homeodomain called the WUS box. Functions in the shoot meristem organizing center to maintain the stem cells in an undifferentiated state
CLV1	0.838	Leucine-rich receptor-like protein kinase family protein; Involved in the detection of CLV3 and CLV3-like peptides, that act as extracellular signals regulating meristem maintenance. Acts with CLV3 as a ligand-receptor pair in a signal transduction pathway coordinating growth between adjacent meristematic regions and controlling the balance between meristem cell proliferation and differentiation;…
CLE18	0.834	CLAVATA3/ESR (CLE)-related protein 18; Member of a large family of putative ligands homologous to the Clavata3 gene. Consists of a single exon; Belongs to the CLV3/ESR signal peptide family
CLE26	0.832	CLAVATA3/ESR (CLE)-related protein 26; Member of a large family of putative ligands homologous to the Clavata3 gene. Consists of a single exon. Can not replace CLV3 function in vivo; Belongs to the CLV3/ESR signal peptide family
CLE42		CLAVATA3/ESR (CLE)-related protein 42; Extracellular signal peptide that regulates cell fate. Represses tracheary element differentiation but promotes the formation of procambial cells; Belongs to the CLV3/ESR signal peptide family (88 aa)
CLE41	0.966	CLAVATA3/ESR (CLE)-related protein 41; Belongs to a large gene family, called CLE for CLAVATA3/ESR-related, encoding small peptides with conserved carboxyl termini. The C-terminal 12 amino acid sequence of CLE41 is identical to that of a dodeca peptide (TDIF, tracheary element differentiation inhibitory factor) isolated from Arabidopsis and functions as a suppressor of plant stem cell differentia…
CLE44	0.952	CLAVATA3/ESR (CLE)-related protein 44; Belongs to a large gene family, called CLE for CLAVATA3/ESR-related, encoding small peptides with conserved carboxyl termini. The C-terminal 12 amino acid sequence of CLE44 is identical to that of a dodeca peptide (TDIF, tracheary element differentiation inhibitory factor) isolated from Arabidopsis and functions as a suppressor of plant stem cell differentia…
AT5G59305	0.9	CLAVATA3/ESR (CLE)-related protein 46; Extracellular signal peptide that regulates cell fate
CLE19	0.861	CLAVATA3/ESR (CLE)-related protein 19; Member of a large family of putative ligands homologous to the Clavata3 gene. Consists of a single exon. Can partially replace CLV3 function in vivo. Regulates root meristem size in a SCR and SHR-independent pathway; Belongs to the CLV3/ESR signal peptide family
PXY	0.86	Leucine-rich repeat receptor-like protein kinase TDR; Acts with CLE41p and CLE44p peptides as a ligand- receptor pair in a signal transduction pathway involved in the regulation of procambium maintenance and polarity during vascular- tissue development. Mediates repression of tracheary element differentiation and the promotion of procambial cells formation and polar division adjacent to phloem ce…
AT1G08590	0.84	Leucine-rich receptor-like protein kinase family protein; Involved in the regulation of procambium maintenance and polarity during vascular-tissue development. Phosphorylates HIRD11 and LHCA1 in vitro
AT4G28650	0.812	Leucine-rich repeat transmembrane protein kinase family protein; Involved in the regulation of procambium maintenance and polarity during vascular-tissue development. Involved in the pollen tube perception of the female signal. Phosphorylates MDSI1; Belongs to the protein kinase superfamily. Ser/Thr protein kinase family
CLE43	0.797	CLAVATA3/ESR (CLE)-related protein 43; Extracellular signal peptide that regulates cell fate; Belongs to the CLV3/ESR signal peptide family
CLV3	0.77	Protein CLAVATA 3; One of the three CLAVATA genes controlling the size of the shoot apical meristem (SAM) in Arabidopsis. Belongs to a large gene family called CLE for CLAVATA3/ESR-related. Encodes a stem cell-specific protein CLV3 presumed to be a precursor of a secreted peptide hormone. The deduced ORF encodes a 96-amino acid protein with an 18-amino acid N-terminal signal peptide. The function…
CLE2	0.761	CLAVATA3/ESR (CLE)-related protein 2; Extracellular signal peptide that regulates cell fate. May act with CLV1 as a ligand-receptor pair in a signal transduction pathway, coordinating growth between adjacent meristematic regions
CLE44		CLAVATA3/ESR (CLE)-related protein 44; Belongs to a large gene family, called CLE for CLAVATA3/ESR-related, encoding small peptides with conserved carboxyl termini. The C-terminal 12 amino acid sequence of CLE44 is identical to that of a dodeca peptide (TDIF, tracheary element differentiation inhibitory factor) isolated from Arabidopsis and functions as a suppressor of plant stem cell differentia…
WOX4	0.952	Encodes a WUSCHEL-related homeobox gene family member with 65 amino acids in its homeodomain. Proteins in this family contain a sequence of eight residues (TLPLFPMH) downstream of the homeodomain called the WUS box. This protein also contains an acidic domain approximately 10 residues upstream of the WUS box. Part of the TDIF-TDR-WOX4 signaling pathway that plays a crucial role in the maintenance…
CLE42	0.952	CLAVATA3/ESR (CLE)-related protein 42; Extracellular signal peptide that regulates cell fate. Represses tracheary element differentiation but promotes the formation of procambial cells; Belongs to the CLV3/ESR signal peptide family
PXY	0.952	Leucine-rich repeat receptor-like protein kinase TDR; Acts with CLE41p and CLE44p peptides as a ligand- receptor pair in a signal transduction pathway involved in the regulation of procambium maintenance and polarity during vascular- tissue development. Mediates repression of tracheary element differentiation and the promotion of procambial cells formation and polar division adjacent to phloem ce…
CLV3	0.899	Protein CLAVATA 3; One of the three CLAVATA genes controlling the size of the shoot apical meristem (SAM) in Arabidopsis. Belongs to a large gene family called CLE for CLAVATA3/ESR-related. Encodes a stem cell-specific protein CLV3 presumed to be a precursor of a secreted peptide hormone. The deduced ORF encodes a 96-amino acid protein with an 18-amino acid N-terminal signal peptide. The function…
CLE40	0.861	CLAVATA3/ESR (CLE)-related protein 40; Extracellular signal peptide secreted by differentiated root cells that regulates root cell fate. Acts with ACR4 as a ligand-receptor pair in a signal transduction pathway, coordinating movement of the root tip and organization of cell divisions in the root meristem. Promotes cell differentiation in the distal root meristem in a dose-dependent manner, especi…
CLE17	0.79	CLAVATA3/ESR (CLE)-related protein 17; Member of a large family of putative ligands homologous to the Clavata3 gene. Consists of a single exon; Belongs to the CLV3/ESR signal peptide family
CLE1	0.777	CLAVATA3/ESR (CLE)-related protein 1; Member of a large family of putative ligands homologous to the Clavata3 gene. Consists of a single exon. Can replace CLV3 function in vivo; Belongs to the CLV3/ESR signal peptide family
WOX14	0.77	Encodes a WUSCHEL-related homeobox gene family member with 65 amino acids in its homeodomain. Proteins in this family contain a sequence of eight residues (TLPLFPMH) downstream of the homeodomain called the WUS box. Functions in the shoot meristem organizing center to maintain the stem cells in an undifferentiated state
AT5G59305	0.764	CLAVATA3/ESR (CLE)-related protein 46; Extracellular signal peptide that regulates cell fate
CLE27	0.738	CLAVATA3/ESR (CLE)-related protein 27; Member of a large family of putative ligands homologous to the Clavata3 gene. Consists of a single exon; Belongs to the CLV3/ESR signal peptide family
CLE45		CLAVATA3/ESR (CLE)-related protein 45; Belongs to a large gene family, called CLE for CLAVATA3/ESR-related, encoding small peptides with conserved carboxyl termini (124 aa)
BAM3	0.971	Leucine-rich repeat receptor-like serine/threonine-protein kinase BAM3; Encodes a CLAVATA1-related receptor kinase-like protein required for both shoot and flower meristem function. It has a broad expression pattern and is involved in vascular strand development in the leaf, control of leaf shape, size and symmetry, male gametophyte development and ovule specification and function
AT2G25790	0.958	Leucine-rich receptor-like protein kinase family protein; Its function is described as protein serine/threonine kinase activity, kinase activity, ATP binding; Involved in transmembrane receptor protein tyrosine kinase signaling pathway, protein amino acid phosphorylation; Located in plasma membrane; Expressed in 23 plant structures; Expressed during 15 growth stages; Contains the following InterP…
CLE26	0.951	CLAVATA3/ESR (CLE)-related protein 26; Member of a large family of putative ligands homologous to the Clavata3 gene. Consists of a single exon. Can not replace CLV3 function in vivo; Belongs to the CLV3/ESR signal peptide family
MAKR5	0.928	Probable membrane-associated kinase regulator 5; Unknown protein; BEST Arabidopsis thaliana protein match is: unknown protein (TAIR:AT1G64080.1); Has 1807 Blast hits to 1807 proteins in 277 species: Archae - 0; Bacteria - 0; Metazoa - 736; Fungi - 347; Plants - 385; Viruses - 0; Other Eukaryotes - 339 (source: NCBI BLink)
BRX	0.903	DZC (Disease resistance/zinc finger/chromosome condensation-like region) domain containing protein; Belongs to five-member BRX gene family. Arabidopsis BRX genes share high levels of similarity among each others, with several conserved domains. The most distinct is BRX domain - highly conserved in all BRX genes among distantly related species. This protein-protein interaction domain is required a…
OPS	0.903	UPF0503 protein At3g09070, chloroplastic; Protein of unknown function (DUF740); Its function is described as molecular_function unknown; Involved in biological_process unknown; Located in plasma membrane; Expressed in 17 plant structures; Expressed during 8 growth stages; Contains the following InterPro domains: Protein of unknown function DUF740 (InterPro:IPR008004); BEST Arabidopsis thaliana pr…
AT5G56040	0.878	Leucine-rich receptor-like protein kinase family protein; Its function is described as protein serine/threonine kinase activity, kinase activity, ATP binding; Involved in transmembrane receptor protein tyrosine kinase signaling pathway, protein amino acid phosphorylation; Located in endomembrane system; Expressed in 22 plant structures; Expressed during 13 growth stages; Contains the following In…
CLV3	0.838	Protein CLAVATA 3; One of the three CLAVATA genes controlling the size of the shoot apical meristem (SAM) in Arabidopsis. Belongs to a large gene family called CLE for CLAVATA3/ESR-related. Encodes a stem cell-specific protein CLV3 presumed to be a precursor of a secreted peptide hormone. The deduced ORF encodes a 96-amino acid protein with an 18-amino acid N-terminal signal peptide. The function…
CLE22	0.834	CLAVATA3/ESR (CLE)-related protein 22; Member of a large family of putative ligands homologous to the Clavata3 gene. Consists of a single exon. Can partially replace CLV3 function in vivo; Belongs to the CLV3/ESR signal peptide family
CLE8	0.832	CLAVATA3/ESR (CLE)-related protein 8; Extracellular signal peptide that regulates cell fate. Represses root apical meristem maintenance. Positively regulates the expression of the transcription factor WOX8 and thus, regulates early embryo development

## Sheet: Table9
Table 9. CLE gene specific primers for RT-qPCR analysis and validation of transgenic plants.
CLE gene specific primers for RT-qPCR analysis
Gene Name	F(5'-3')	R(5'-3')
GhCLE28.1	GTGGTGATGCTGTCGTTCAT	CGCCATTGTTGGGTTACCAT
GhCLE2	CATCGCTCTCACACGCCTAT	AGGGATGGAAGGGGTGACAT
GhCLE33.2	AGGCTGTCGATACGAAGGGA	TCGTTTGCTTGTTCGATTCGG
GhCLE7.2	CCGTCTTACAGATTTGGATTTGC	ATCGCCTCCCTTGAAACTGA
GhCLE38	CCGTGCTTGTGGGAGTTGTT	ACCGTTGTCGATTTCGTCGTG
GhCLE12.1	CGCCCTCCTTGTGATTCTTT	TGATGGCAAGAAAGGGTGGA
GhCLE12.2	CTCAACTCCGCCACCACTA	TGATGGCAAGAAAGGGTGGA
GhCLE31	ACACAAGCAACCTGTGAAGG	AACGGTTGTGGAGTGGATCT
GhCLE5.2	CCTCGAATTCGCATCCGTTT	TGGATTCAGGATTCGGTCCA
GhCLE9.2	AAAGACGCCAGTACCAGCAG	AGCAGTGTCCAAAGACAGGG
GhCLE34.2	ACCATGCAGAGTTTGTGGGT	ACAGCTTTGAGAACACGTCCA
GhCLE35.2	GTCATCGACAACGACAGCAA	TGCGCCACATTTGACTTTCT
CLE gene specific primers for validation of transgenic plants
Gene Name	F(5'-3')	R(5'-3')
GhCLE28.1	CAAGTTCTAGGCTGGTGGTG	GTTGGGTTACCATGAGGTCC
GhCLE2	AACATCATCGCTCTCACACG	GGGGCAAGTTCATGGTTGAT
GhCLE33.2	TGGTTTGCAGTGCTCAAAGA	CGTTTGCTTGTTCGATTCGG
